# Supplementary material for: Glycoproteins Involved in Sea Urchin Temporary Adhesion
Source: MDPI journal article supplement (doi:10.3390/md21030145), 2023-02-24
Supplement: s1 [file s1]

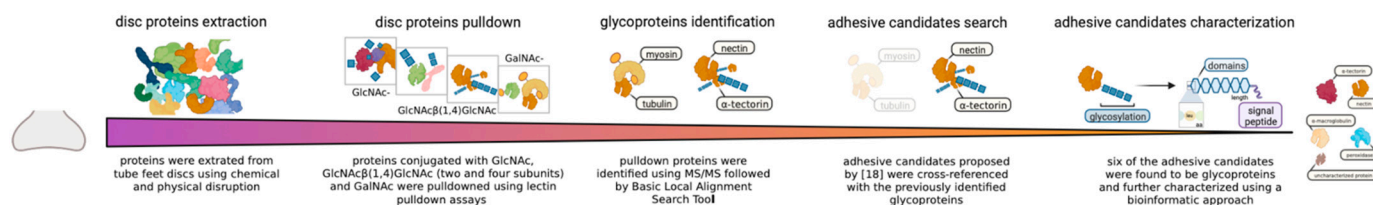

**Figure S1. Proteomic workflow of the present study.** Schematic representation of the study workflow. Sample collection days: 8 (N=3 sea urchins); tandem MS and pull-downs (N=2).

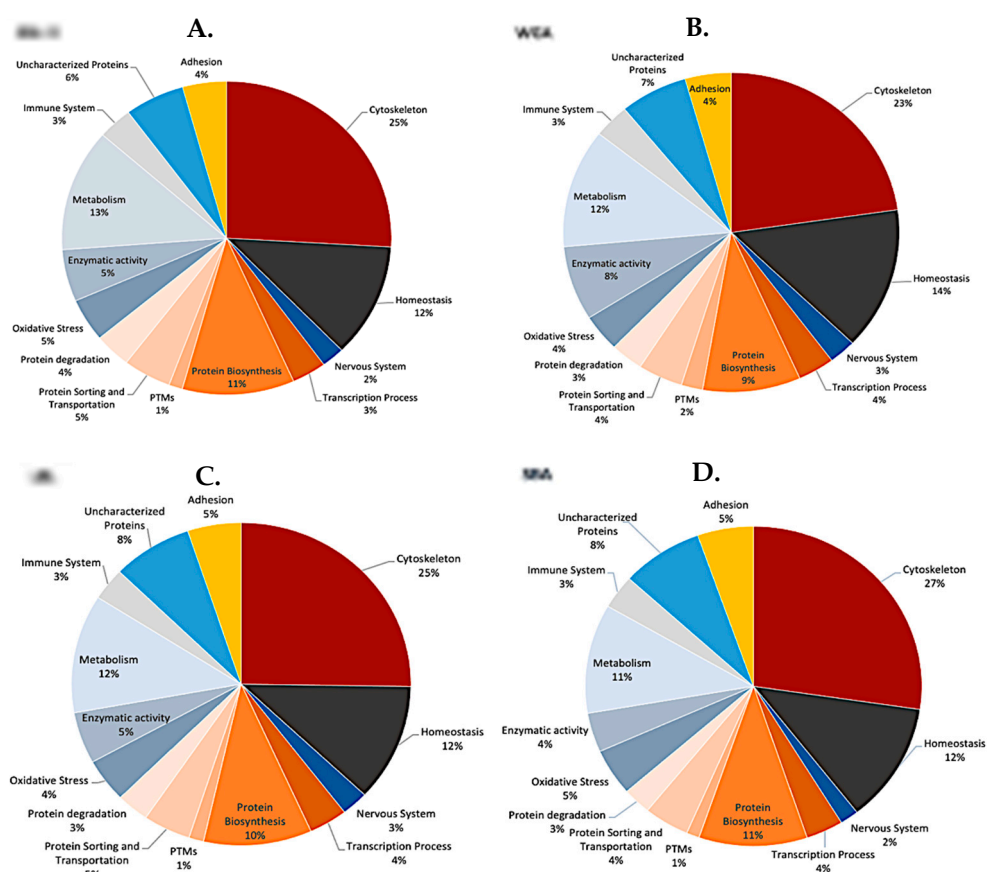

**Figure S2. Global protein composition by functional groups of *Paracentrotus lividus* disc proteins pulldown with lectin-bounded agarose beads.** GSL II was used to detect the presence of N-acetylglucosamine; WGA and LEL to detect chitobiosis and SBA to detect N-acetylgalactosamine conjugated with proteins (N=2). Abbreviations: GSL II, *Griffonia simplicifolia* lectin II; LEL, *Lycopersicon esculentum* lectin;

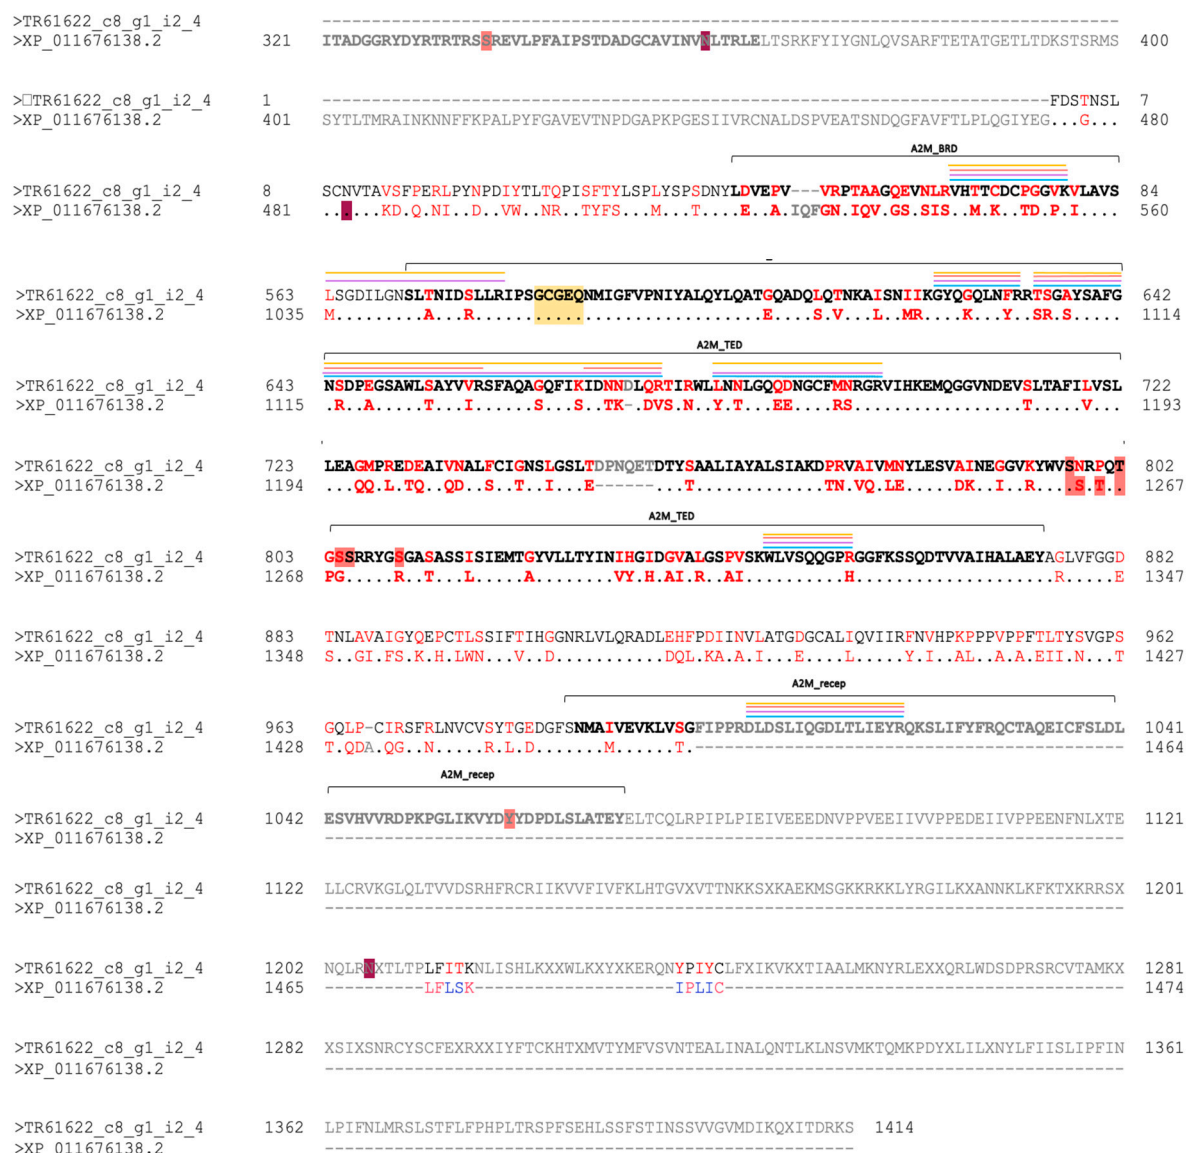

**Figure S3. Alpha-2-macroglobulin like sequence alignment.** Sequence alignment of *Paracentrotus lividus* alpha-2-macroglobulin and sea urchin *Strongylocentrotus purpuratus* alpha-2-macroglobulin homologous protein. Between sequences, black dots represent equal amino acids, red letters different amino acids in the same position and dash missing amino acids in the aligned sequence. Identified peptides by MS/MS (dashed over the sequences) validated N- (in purple) and O--glycosylation sites. Peptides were found in several lectin-pulldowns specifically GSL II (blue dash), WGA (pink), LEL (purple) and SBA (orange).

|                        |                                                                                                       |      |
|------------------------|-------------------------------------------------------------------------------------------------------|------|
| Consensus sequence 1   | TR46688_c0_g1_i1_6<br>P L G A V N F M N V H P F S Y I V F G S A P G S P S T W N F P Y P A L S T T V C | 42   |
| XP_030852014.1 UP 1201 | eitfetpgvlnldgptrfrigladdgtiellklenggg...I...GM.....G.N...S...T.T.N..                                 | 1280 |
| Consensus sequence 43  | DTQELNIGCPNGQFIDLMYASYGYHPDAISCSEDLPYSCHNENSFSEVLQRCQGIESCFAQVSTGLFSADPCPLTPKS                        | 122  |
| XP_030852014.1 UP 1281 | .S.VMS.A...Y...S...SAA.TA...DGOA.A...S...KA...TA.V.NDPCV.M...                                         | 1359 |
| Consensus sequence 123 | LAIRYRCFSSPIQKTGRTGACIEMCCNGGYCIRSNGAALCRCQSGWTGTHCEISESTCTHYGSSHFTTFDGKHYEFPIS                       | 202  |
| XP_030852014.1 UP 1360 | .TV..Q.VAD.S.E...DL..M...F..M..S...PT..ER.AV.S.F..A..M...N.R....                                      | 1439 |
| Consensus sequence 203 | SNGNEDCTFVLVRHEAHIGETFDVLARNGEITHIEINSRMIKLGEDVRIDGLPVQLDFTdsstPPLFRIDQGNEEFVVEL                      | 282  |
| XP_030852014.1 UP 1440 | R...E...SASGES...V...Q...A...S---A...Q.S.K..G..A.T.                                                   | 1515 |
| Consensus sequence 283 | NVGMTIAYKKGILHISMAASAAVSLGCDNNGNINDDFKLANNEITAVPMEFVQEHCTQCTISNTEDECVGQA--QARD                        | 360  |
| XP_030852014.1 UP 1516 | ...E...T.F.T.TGDA..L...N.D.DADN..E.E.D...LAK...Q..T..PLA...A..SMrd...E                                | 1595 |
| Consensus sequence 361 | QCNMFIETDFAACTAAVSSELFLDECSYDVCRSKSYCDLSLEAYVSRCKERNIPLPDWRQTVGCVMECGPNMVYDECSS                       | 440  |
| XP_030852014.1 UP 1596 | .SV..SSNL.DN.L.S-EPLVA...RGH...T..EN...N.MP...DS...E..A.                                              | 1674 |
| Consensus sequence 441 | ACQATCLNPTASANCALPSSCVERCVCQDPFILKSGRCVPMACQFTM---LMTGGEQLGNSP---PAFIP-PSRGSPAP                       | 512  |
| XP_030852014.1 UP 1675 | .P..Q...QE...NLP...EAG...A...QpaAEV.FEIVQA.vrqq.VVA.a..PVV...                                         | 1752 |
| Consensus sequence 513 | VPAP---Q.GMDLQOLFOL--GGQ.PAGQVPVPV-GQPAPSP-----VGQPAFFSV-G                                            | 560  |
| XP_030852014.1 UP 1753 | .S.v...G.IPN.GSL.A.nq.VPA..PA...A.AS...A.gqfnlapapapaapapapagaQPA...A..p.                             | 1832 |
| Consensus sequence 561 | QPVP--PGFSLADMLRNLRGQ.PAPQGPAPGPVSGPAPGPV-----AGPAPVPSPNPQVPSP.PTASVPVQPGPAP                          | 632  |
| XP_030852014.1 UP 1833 | .Aa..Q.N..PAPAAP...A.V...A.LNL.SLKLfqlnqp.Q...S.PVAG...P.V.GQVPVSP.VAGQ                               | 1911 |
| Consensus sequence 633 | QPVPQFgipilrlfqlgQGPAP.PAGQPVGQGPAP.PVGGQGPAP.PAGQGPAP.PAGQGPAPFAG-----                               | 705  |
| XP_030852014.1 UP 1912 | PVPSP...VAGQ.V.SPPVA...V.S.VG...V.S.PV...V.S.PV...I.PAEVPEmcdniy                                      | 1977 |
| Consensus sequence     | gfdvfarpnycddktvifygdpmqchgdksinylvrvrlepfyvrfyrmgrnmllilvgstvtpttlnetlaisipyr                        | 2057 |
| XP_030852014.1 UP 1978 |                                                                                                       |      |
| Consensus sequence     | kgdflavsfqtlvlysytkggtstatilvvdynhvpaiasslpgtttfiterelqekreysimatldcecdgepgqpsidc                     | 2137 |
| XP_030852014.1 UP 2058 |                                                                                                       |      |
| Consensus sequence     | nsplgmmsraipdasitsssaiegspasegrlyslvgmlfmggegwaatsesgqwiqvrlnaatnvvgltqggggsgss                       | 2217 |
| XP_030852014.1 UP 2138 |                                                                                                       |      |
| Consensus sequence     | qewtsyavqyalgsdmpqyfrddkdmmtgfmngtdketivtnyfwkpvkaevirilpknwssrismrfeylgladnpc                        | 2297 |
| XP_030852014.1 UP 2218 |                                                                                                       |      |
| Consensus sequence 1   | TCIMYPTSSIMTYDERQYFFPGEDYVATQTCDENAAESFQV                                                             | 42   |
| XP_030852014.1 UP 2298 | dsspcqngggvc...hdtrt...gymcacqerfsgkmcdeieg...VL.....KNYY...Q.E...S...Q.GQD...                        | 2377 |
| Consensus sequence 43  | YVKNIPStDPVSYVPARREIRVELNGKSYELKEKEFYLDGERISLPYIRPNVQVILAGNNFPVLKTDDFGLRVWWDGRRT                      | 122  |
| XP_030852014.1 UP 2378 | F.N...A..I.N...V.D.T...A.LNL.SLKLfqlnqp.Q...S.PVAG...P.V.GQVPVSP.VAGQ                                 | 2456 |
| Consensus sequence 123 | VRIEVPSHHQDMCGLCGNFNDATDDFIMRGSSVASAPAFGFSWASNSPDCPTRCPFCQDPSCDTQIAQLDASSVCS                          | 202  |
| XP_030852014.1 UP 2457 | .K...L..K...D.Q...R.QA...LP.A...T.GQQ.TA...NEV...VNNV.K.S.ETI...                                      | 2536 |
| Consensus sequence 203 | EMNIPFKTCLDAMPNTYMSDCVAGRCAI-QDDDLFCLEMLVNLAYQCEIMGVSVGRWRDAITRCAPITPEGTMYPECLVP                      | 281  |
| XP_030852014.1 UP 2537 | ...A..A...S...TS.I..Tds.S...SE..V..L...V...P...S..S.                                                  | 2616 |
| Consensus sequence 282 | CTPTCADPGAEKCDLMTCEVGYACSPGLVFNGETCQVTRCCCLVEGKSYDVGESYLIHDCTEQCVCSEGGNMECMPVE                        | 361  |
| XP_030852014.1 UP 2617 | ...GN.NTA...M...AE...M...I...VN...H...KA...                                                           | 2696 |
| Consensus sequence 362 | CHMDATCAVQGGYTCHCNDGFSGRGLETCCLAINQPIMTQCENEDVTLTCEGLIDVLSVYGGQDGLSECLSSGFLLG                         | 441  |
| XP_030852014.1 UP 2697 | ...K.S.ME.N.K...A.Q...F.V...ATT...V...AI...V...I.A...A.PT...S                                         | 2776 |
| Consensus sequence 442 | TCSAEGVLLPVQLQCQGRPECTFTANMFMGEPENGVAKYIRVQHHCQOPLASEVPQTPVRRNMPQGNIMVLECPDGTF                        | 521  |
| XP_030852014.1 UP 2777 | .A...T..A..NR...KA...SDV..V...KA...V..E...PEA.G...I...AS...N.Q..E...                                  | 2855 |
| Consensus sequence 522 | LDIQRARYGRPDREESCFSAEVRVAMCQGLTRCEVDVTDNLGETCEMTNNILEVNFESAQPVDRSTILGHCNEN                            | 601  |
| XP_030852014.1 UP 2856 | ...V.F...PS..AII..A...Q.Q...VA..T...P..M...S...E...STIM...                                            | 2935 |

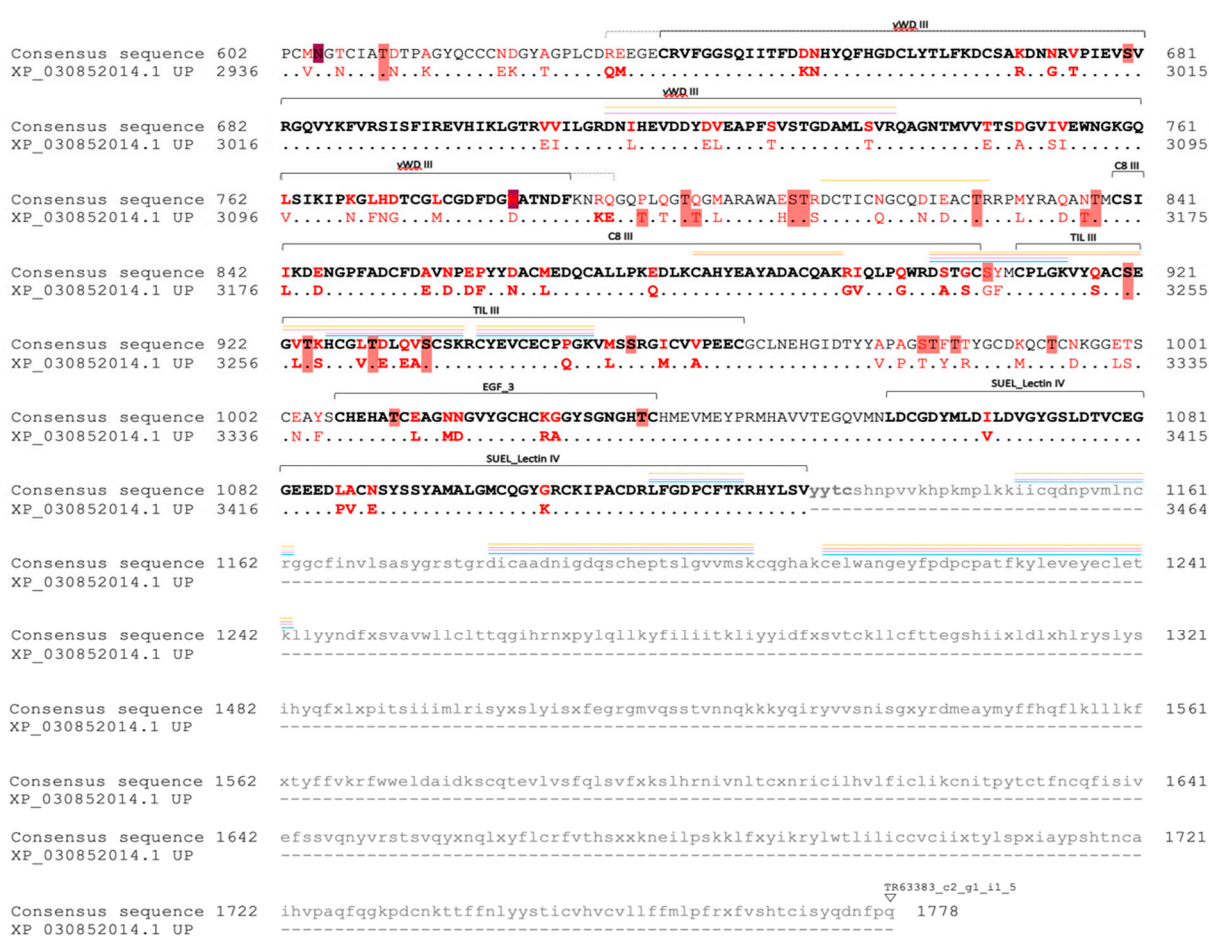

**Figure S4. Alpha-tectorin like sequence alignment.** Sequence alignment of *Paracentrotus lividus* alpha-tectorin and sea urchin *Strongylocentrotus purpuratus* uncharacterized protein LOC100892803 homologous protein. Between sequences, black dots represent equal amino acids, red letters different amino acids in the same position and dash missing amino acids in the aligned sequence. Identified peptides by MS/MS (dashed over the sequences) validated N- (in purple) and O--glycosylation sites. Peptides were found in several lectin-pulldowns specifically GSL II (blue dash), WGA (pink), LEL (purple) and SBA (orange).

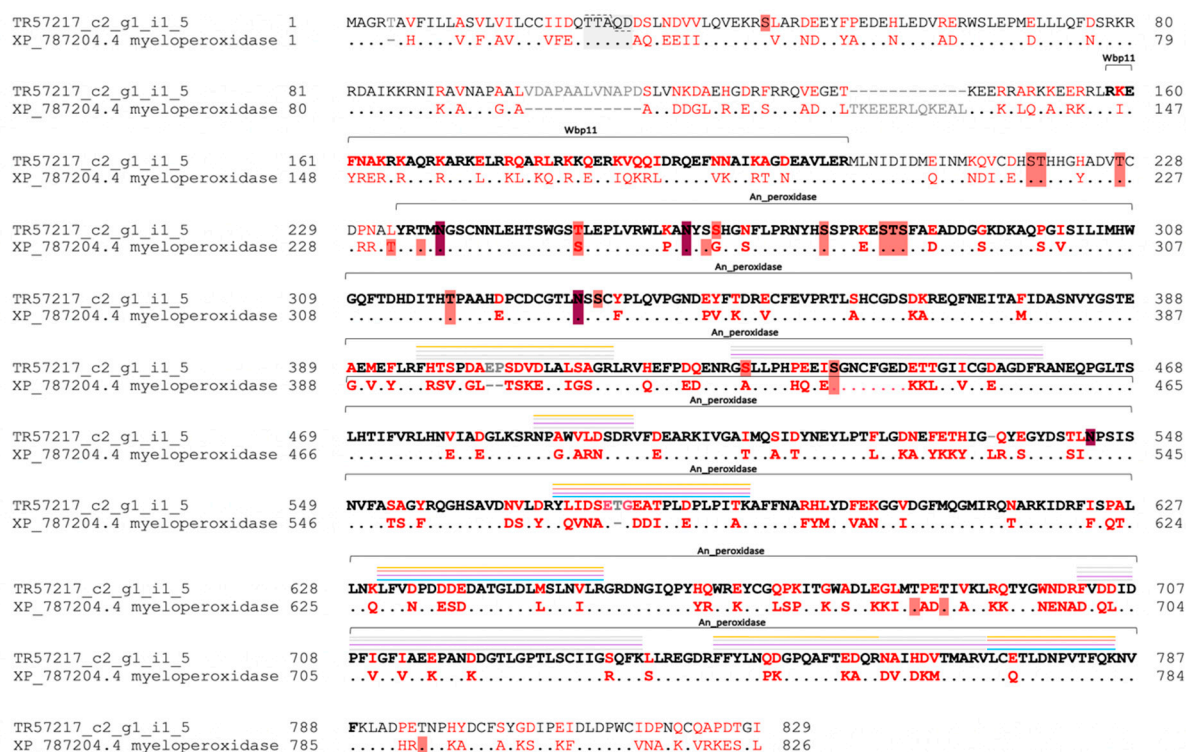

**Figure S5. Myeloperoxidase sequence alignment.** Sequence alignment of *Paracentrotus lividus* and sea urchin *Strongylocentrotus purpuratus* myeloperoxidase homologous proteins. Between sequences, black dots represent equal amino acids, red letters different amino acids in the same position and dash missing amino acids in the aligned sequence. Identified peptides by MS/MS (dashed over the sequences) validated N- (in purple) and O--glycosylation sites. Peptides were found in several lectin-pulldowns specifically GSL II (blue dash), WGA (pink), LEL (purple) and SBA (orange).

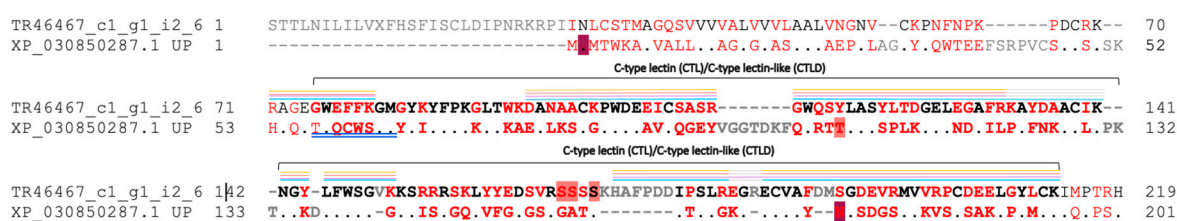

**Figure S6. Uncharacterized protein sequence alignment.** Sequence alignment of *Paracentrotus lividus* and sea urchin *Strongylocentrotus purpuratus* uncharacterized proteins homologous proteins. Between sequences, black dots represent equal amino acids, red letters different amino acids in the same position and dash missing amino acids in the aligned sequence. Identified peptides by MS/MS (dashed over the sequences) validated N- (in purple) and O--glycosylation sites. Peptides were found in several lectin-pulldowns specifically GSL II (blue dash), WGA (pink), LEL (purple) and SBA (orange).

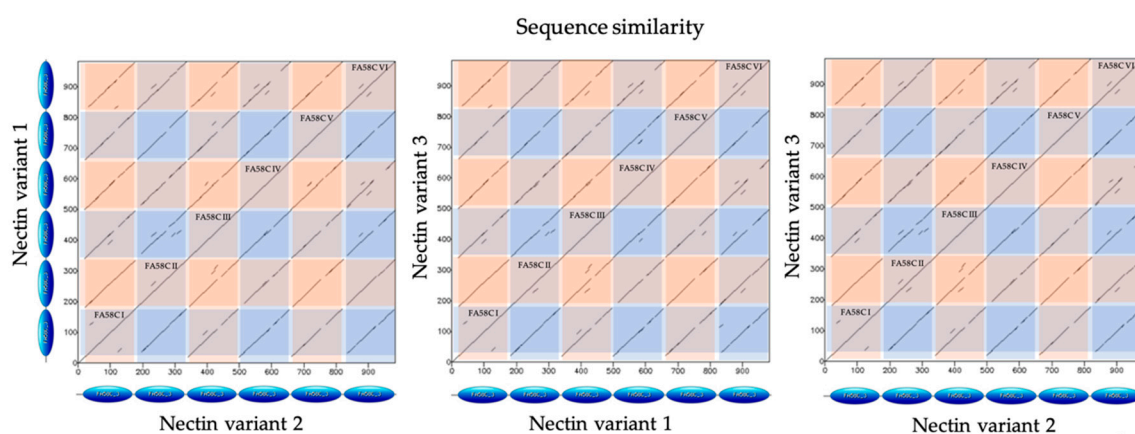

161

**Figure S7. Comparison of Nectin variants.** Graphical representation of the similarity regions between two protein sequences using EMBOSS Dotmatcher. Local regions of similarity correspond to diagonals in the dotplot. Structural variations are represented as gaps on the diagonal lines (deletion and insertions) or duplication of a sequence segment towards one of the axis (duplication).

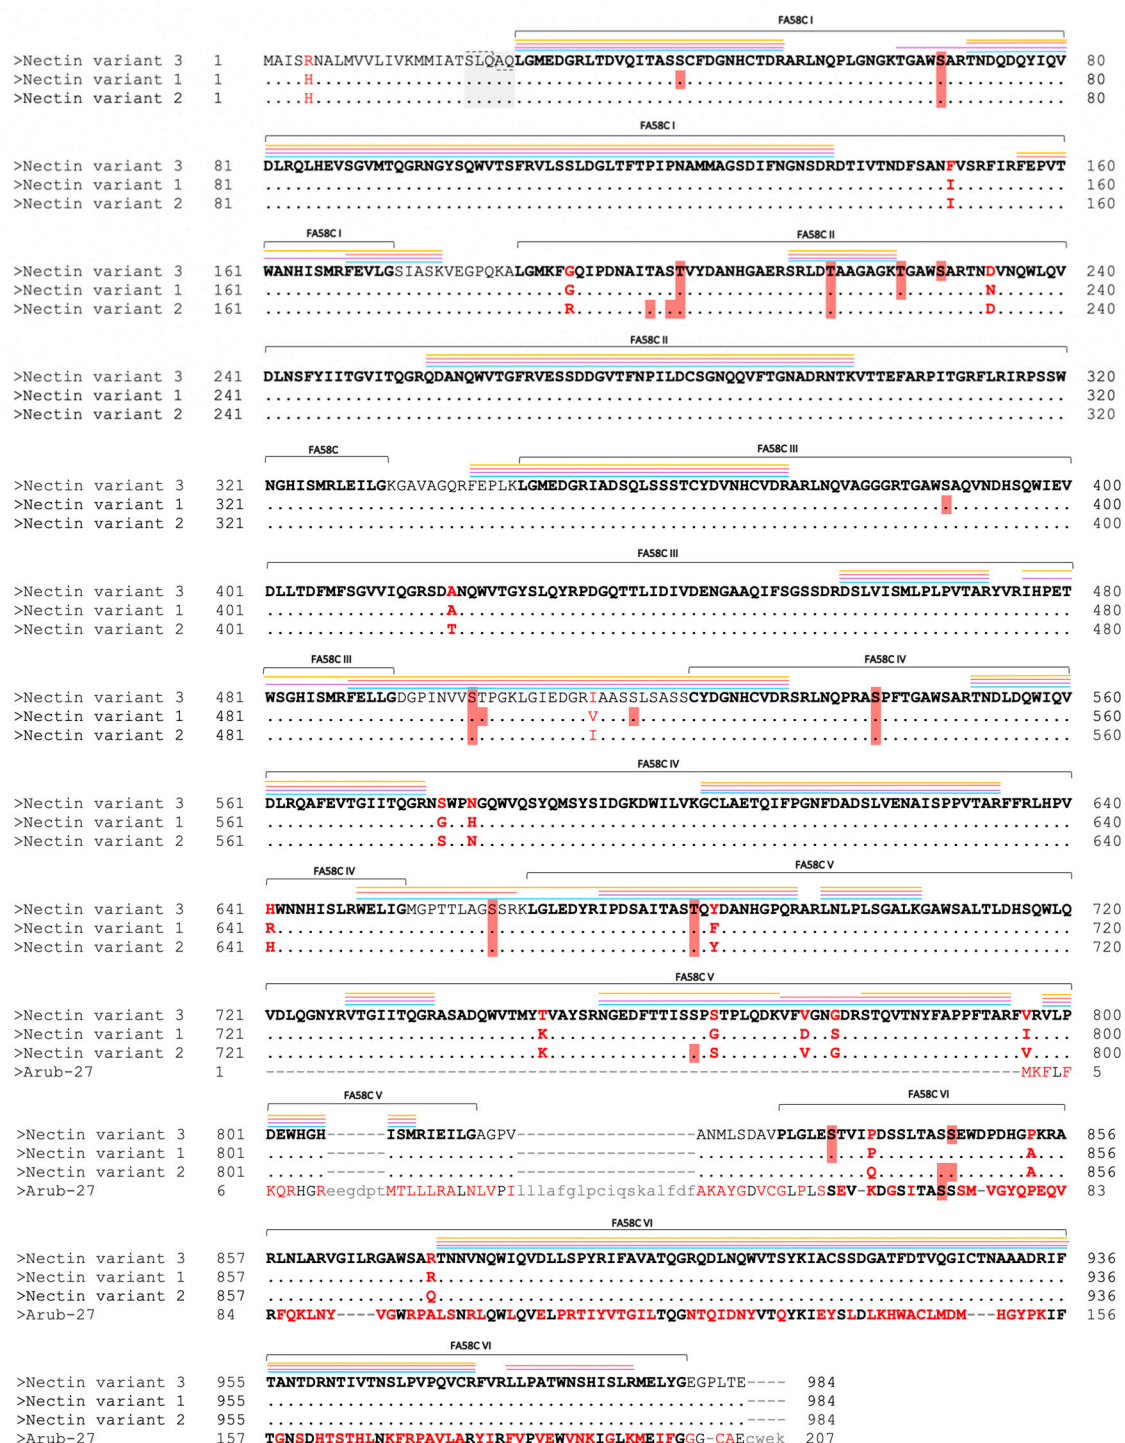

**Figure S8.** Nectin sequence alignment. Sequence alignment of *Paracentrotus lividus* Nectin variants and sea star *Asteria rubens* Arub-27. Between sequences, black dots represent equal amino acids, red letters different amino acids in the same position and dash missing amino acids in the aligned sequence. Identified peptides by MS/MS (dashed over the sequences) validated N- (in purple) and O- glycosylation sites. Peptides were found in several lectin-pulldowns specifically GSL II (blue dash), WGA (pink), LEL (purple) and SBA (orange).

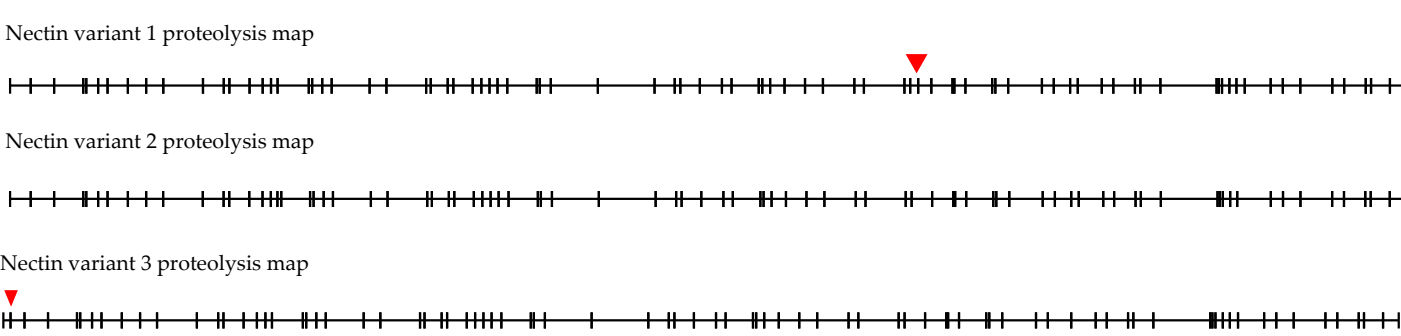

**Figure S9. Proteolysis map of Nectin variants.** Sites predicted to be cleaved by trypsin were performed with proteolysis mapping tool. Cleavage sites are identified by black lines, while differences between sequences are emphasize as a red arrow.
