# Supplementary material for: Glycoproteins Involved in Sea Urchin Temporary Adhesion
Source: Mar Drugs. 2023 Feb 24;21(3):145. doi: 10.3390/md21030145 (PMC10057474; doi:10.3390/md21030145)
Supplement: Supplementary file 1 [file marinedrugs-21-00145-s001.zip › Supplementary tables_revised.xlsx]

## Sheet: Table S1
Table S1. Enzyme-linked lectin assay absorbance values. Abbreviations: GSL II, Griffonia simplicifolia lectin II; Gal, galactose; GalNAc, N-acetylgalactosamine; GlcNac, N-acetylglucosamine; LEL, Lycopersicon esculentum lectin; SBA, Soybean agglutinin; WGA, wheat germ agglutinin.
	Lectin		Lectin inhibited		Lectin inhibited		Lectin inhibited GalNAc		Lectin inhibited		Lectin inhibited		Lectin inhibited		No protein
			GlcNAc		GlcNAcβ(1,4)GlcNAc				Gal		E-5100		E-2100
	Mean	SD	Mean	SD	Mean	SD	Mean	SD	Mean	SD	Mean	SD	Mean	SD	Mean	SD
GSL II	1.163	0.018	0.683	0.0972	0.897	0.073	---	---	---	---	0.068	0.006	---	---	0.088	0.019
WGA	1.256	0.051	0.020	0.022	0.181	0.022	---	---	---	---	0.069	0.006	---	---	0.059	0.0034
LEL	1.254	0.144	0.051	0.002	0.309	0.0025	---	---	---	---	0.0881	0.006	---	---	0.055	0.002
SBA	1.237	0.019	---	---	---	---	0.951	0.02	1.193	0.03	---	---	0.055	0.008	0.068	0.003

## Sheet: Table S2
Table S2. Enzyme-linked lectin assay statistical analysis. T-testes were performed, comparing each condition. Only p-values <0.001 were considered statistically relevant, leading to the rejection of the null hypothesis – in which the mean value for two of the tested conditions is the same (results highlighted in red). Values above this treshould are represented in black. Abbreviations: GSL II, Gr…
		Lectin inhibited	Lectin inhibited	Lectin inhibited GalNAc	Lectin inhibited	Lectin inhibited	Lectin inhibited	No protein
		GlcNAc	GlcNAcβ(1,4)GlcNAc		Gal	E-5100	E-2100
GSL II	Lectin	6.41 x10-9	1.02 x10-9	---	---	< 2.2 x10-16	---	< 2.2 x10-16
	No protein	1,02 x10-9	6,848 x10-14	---	---	0.0611	---	---
WGA	Lectin	< 2.2 x10-16	< 2.2 x10-16	---	---	< 2.2 x10-16	---	< 2.2 x10-16
	No protein	1.58 x10-8	3.52 x10-11	---	---	0.004	---	---
LEL	Lectin	7.14 x10-13	1.12 x10-15			3.01 x10-14		4.83 x10-14
	No protein	0.01	< 2.2 x 10-16	---	---	7.55 x10-8	---	---
SBA	Lectin	---	---	2.41 x10-11	0.004	---	< 2.2 x10-16	< 2.2 x10-16
	No protein	---	---	< 2.2 x10-16	< 2.2 x10-16	---	0.002	---

## Sheet: Table S3
Table S3. Identification of lectin-pulldown proteins.
GO annotation	Protein name	Transcript		GSL II	WGA	LEL	SBA		x	In both replicates
Cytoskeleton	Actin [SP]	TR62319_c5_g1_i1_4		x	x	x	x		x	Replicate 1: identified in the first 500 protein
		TR63153_c7_g2_i3_1		x	x	x	x		x	Replicate 2: identified in the first 500 protein
		TR6830_c0_g1_i1_4		x	x	x	x			Not found
		TR40298_c0_g1_i1_5		x	x	x	x
		TR63153_c3_g1_i1_5		x	x	x	x
		TR63153_c7_g2_i2_1		x	x	x	x
		TR37258_c0_g1_i1_5		x	x	x	x
		TR38531_c0_g1_i1_4		x	x	x	x
		TR26931_c0_g1_i1_4		x	x	x	x
		TR63153_c7_g2_i1_1		x	x	x	x
		TR21183_c0_g1_i1_4		x	x	x	x
		TR10601_c0_g1_i1_5		x	x	x	x
		TR45351_c0_g1_i2_5		x	x	x	x
		TR63153_c7_g2_i4_2		x	x	x	x
		TR54248_c2_g1_i3_6		x	x	x	x
		TR50039_c1_g1_i1_5		x	x	x	x
		TR63153_c7_g2_i4_5		x	x	x	x
		TR20247_c0_g1_i1_5		x	x	x	x
		TR92350_c0_g1_i1_6		x	x	x	x
		TR18067_c0_g1_i1_4		x	x	x	x
		TR63153_c7_g1_i1_3		x	x	x	x
		TR25019_c0_g1_i1_3		x	x	x	x
		TR39465_c0_g1_i1_2		x	x	x	x
		TR101123_c0_g1_i1_6		x	x	x	x
		TR91747_c0_g1_i1_5		x	x	x	x
		TR40791_c0_g1_i1_3		x	x	x	x
		TR50120_c0_g1_i1_5		x	x	x	x
		TR33635_c0_g1_i1_4		x		x
		TR62319_c5_g1_i2_4		x	x	x	x
		TR54248_c2_g1_i1_5			x
	Actin-related protein [2/3 complex subunit 1A SP]	TR58141_c2_g1_i3_6		x	x	x	x
		TR58141_c0_g1_i1_1		x	x	x	x
		TR58141_c1_g1_i1_3		x	x	x	x
		TR49723_c0_g3_i1_5		x	x	x	x
	Actin-related protein [2/3 complex subunit 2 SP]	TR62472_c7_g1_i1_4		x	x	x	x
		TR16820_c0_g1_i2_2		x	x	x	x
		TR62472_c3_g1_i1_1		x	x	x	x
		TR16820_c0_g1_i1_2		x	x	x	x
	Actin-related protein [2/3 complex subunit 4 SP]	TR60690_c0_g1_i4_4			x	x	x
	actin-related protein 2/3 complex subunit 3-B-like isoform X2 [Strongylocentrotus purpuratus]	TR63954_c44_g2_i1_4			x
		TR72043_c0_g1_i1_3			x
	Actin-related protein	TR61594_c11_g2_i1_6		x	x	x	x
		TR61594_c4_g1_i1_1		x	x	x	x
		TR61594_c3_g1_i1_2		x	x	x	x
		TR61594_c2_g1_i1_1		x	x	x	x
		TR61594_c2_g2_i1_3			x
		TR20020_c0_g1_i1_6		x	x
	Actin-related protein	TR50900_c5_g1_i1_5		x	x	x	x
		TR2607_c0_g1_i1_1		x	x	x	x
		TR79589_c0_g1_i1_3		x	x	x
	Adenylyl cyclase-associated protein	TR61763_c4_g1_i1_4		x	x	x	x
		TR39525_c0_g1_i1_2		x	x	x	x
		TR98261_c0_g1_i1_1		x	x	x	x
	Alpha-actinin	TR62341_c5_g3_i3_5		x	x	x	x
		TR62341_c5_g3_i1_4				x
		TR1853_c0_g1_i1_3		x	x	x	x
		TR11702_c0_g1_i1_3		x	x	x	x
		TR20292_c0_g1_i1_1		x	x	x	x
		TR79289_c0_g1_i1_2		x			x
	Ankyrin	TR63381_c5_g1_i2_5		x	x	x	x
		TR63381_c5_g1_i1_5		x	x	x	x
		TR63381_c4_g1_i3_1		x	x	x	x
		TR63381_c6_g1_i1_3		x	x	x	x
		TR63381_c4_g1_i1_3		x	x	x	x
	Annexin	TR47661_c3_g1_i1_5		x	x	x	x
		TR47661_c3_g1_i2_5		x	x	x	x
		TR47661_c2_g1_i1_2		x	x	x	x
		TR31049_c0_g1_i5_1		x	x	x	x
		TR31049_c0_g1_i2_1		x	x	x	x
		TR31049_c0_g1_i3_2		x	x	x	x
		TR47661_c3_g2_i1_4		x	x	x	x
		TR26881_c0_g1_i1_6		x	x	x	x
		TR31049_c0_g1_i1_2		x	x	x	x
	Annexin	TR63045_c7_g1_i1_4		x	x	x	x
	Alpha-adducin	TR62496_c1_g1_i1_4		x	x	x	x
		TR62496_c1_g1_i2_4		x	x	x	x
		TR62496_c1_g1_i3_4		x	x	x	x
		TR66696_c0_g1_i1_3		x	x	x	x
	Calpain	TR57806_c1_g1_i1_4		x	x	x	x
		TR63282_c1_g1_i1_5		x	x		x
		TR63282_c1_g1_i4_6		x
	cofilin (SP)	TR48056_c0_g1_i1_3		x	x	x	x
		TR48056_c0_g1_i2_1		x	x	x	x
	Coronin-6	TR45516_c0_g1_i2_1		x	x	x	x
		TR45516_c0_g1_i1_1		x	x	x
	Clathrin heavy chain	TR62895_c3_g1_i1_4		x	x	x	x
		TR84082_c0_g1_i1_1		x	x	x	x
	Cytoplasmic dynein 1 heavy chain 1 (SP)	TR63558_c1_g5_i3_5		x			x
		TR63558_c1_g5_i2_5		x	x		x
		TR6611_c0_g1_i1_6		x			x
		TR63558_c1_g5_i1_4		x	x		x
		TR63558_c2_g1_i1_2
	Cytoplasmic dynein 1 intermediate chain 1	TR53341_c0_g1_i1_6		x	x	x
	Dynein light chain	TR62980_c1_g1_i1_4			x	x	x
	Drebrin-like protein	TR57424_c1_g1_i1_1		x	x	x	x
	Dynamin-1 isoform X3 [SP]	TR61261_c0_g1_i1_5		x	x	x	x
	Dynein light chain 2	TR40666_c0_g1_i1_4		x	x	x	x
		TR45653_c0_g2_i4_3		x	x	x	x
		TR47434_c0_g1_i1_6		x	x	x	x
		TR47434_c0_g1_i2_6		x	x		x
	Dysferlin	TR63583_c3_g1_i2_6		x	x	x	x
		TR63583_c3_g1_i4_6		x	x	x	x
		TR63583_c3_g1_i1_5		x	x	x	x
		TR43342_c2_g1_i1_3		x	x	x	x
		TR54518_c1_g1_i1_4		x		x	x
		TR35435_c0_g1_i1_2		x		x	x
		TR63583_c1_g1_i1_2		x	x	x	x
		TR55519_c6_g1_i1_6					x
		TR54518_c1_g1_i2_4					x
	Microtubule-actin cross-linking factor 1	TR45938_c0_g1_i1_5		x	x	x	x
	Echinoderm microtubule	TR60034_c3_g1_i1_4		x	x
		TR60034_c3_g1_i10_4		x	x	x	x
		TR60034_c3_g1_i2_6		x	x	x	x
	EH domain-containing protein 1	TR47460_c0_g1_i1_4		x	x	x	x
	Fascin (monomeric actin filament)	TR53552_c1_g1_i1_4		x	x	x	x
		TR10242_c0_g1_i1_1		x	x	x	x
		TR6662_c0_g1_i1_2		x	x	x	x
		TR64720_c0_g1_i1_2
	Filamin A	TR60928_c4_g1_i1_4		x	x	x	x
		TR75060_c0_g1_i1_1		x	x	x	x
		TR60928_c3_g1_i1_2		x	x	x	x
		TR6599_c0_g1_i1_3		x		x	x
		TR60928_c3_g1_i2_2			x	x
	F-actin capping protein	TR59025_c3_g1_i1_5		x	x	x	x
		TR59025_c0_g1_i1_2		x	x	x	x
		TR93002_c0_g1_i1_1		x	x	x	x
	F-actin-capping protein subunit beta	TR63576_c5_g2_i2_4		x	x	x	x
		TR63576_c1_g1_i1_3		x	x	x	x
		TR63576_c4_g2_i1_2		x	x	x	x
	Gelsolin	TR58561_c5_g2_i1_5		x	x	x	x
		TR58561_c5_g2_i2_6		x	x	x	x
		TR58561_c4_g1_i1_3		x	x	x	x
		TR58561_c4_g1_i6_1		x	x	x	x
		TR58561_c4_g1_i2_1		x	x	x	x
		TR41129_c0_g1_i2_2		x	x	x	x
		TR58561_c4_g1_i5_3		x	x	x	x
		TR26082_c0_g1_i1_1		x	x	x	x
		TR58561_c4_g1_i3_1		x	x	x	x
	Gelsolin-like protein	TR14417_c0_g1_i1_1				x	x
		TR11040_c0_g1_i1_6				x	x
	Gelsolin-like protein	TR58765_c3_g1_i3_4		x
		TR61622_c0_g1_i1_1		x	x	x	x
		TR20139_c0_g1_i1_1		x	x	x	x
		TR58765_c2_g1_i1_1		x	x	x	x
		TR10340_c0_g1_i1_6		x	x	x	x
		TR69681_c0_g1_i1_2		x	x	x	x
		TR58765_c3_g1_i2_6			x	x	x
	Guanine nucleotide-binding protein G(i) subunit alpha 1	TR60699_c5_g1_i1_6		x	x	x	x
		TR47710_c0_g1_i2_4		x	x	x	x
		TR60841_c0_g1_i1_4		x	x	x	x
		TR97570_c0_g1_i1_2		x	x	x	x
		TR23235_c0_g1_i1_3		x	x	x	x
		TR60699_c0_g1_i1_2		x	x	x	x
	guanine nucleotide-binding protein G(12) alpha subunit [Strongylocentrotus purpuratus]	TR36646_c0_g1_i1_5			x		x
	GTP-binding nuclear protein Ran	TR37214_c0_g2_i1_1		x	x	x	x
		TR33708_c0_g1_i1_6		x	x	x	x
		TR37214_c0_g1_i1_2		x	x	x
	GTP-binding protein SAR1b [Strongylocentrotus purpuratus]	TR52410_c1_g1_i1_6
	Kinectin	TR61333_c0_g1_i2_4		x	x	x	x
		TR61333_c0_g1_i5_4		x	x	x	x
		TR61333_c0_g1_i7_5		x
		TR61333_c0_g1_i3_5		x	x	x	x
		TR61333_c0_g1_i1_5		x	x	x	x
		TR9664_c0_g1_i1_2		x	x	x	x
		TR32839_c1_g1_i1_6		x	x		x
		TR61333_c0_g1_i4_5				x
	Kinesin heavy chain [SP]	TR60753_c2_g2_i5_4		x	x	x
		TR60753_c2_g2_i4_6			x	x
		TR60753_c2_g2_i1_5		x
	Lethal(2) giant larvae protein homolog	TR63890_c2_g1_i2_4		x	x	x	x
		TR63890_c0_g1_i1_2		x	x	x	x
		TR63890_c1_g1_i2_1		x		x
		TR16867_c0_g1_i1_3		x	x	x	x
	microtubule-actin cross-linking factor 1 isoform X2 [Strongylocentrotus purpuratus]	TR62328_c4_g1_i3_4			x		x
		TR51668_c0_g1_i5_3			x		x
		TR51668_c0_g1_i1_3			x		x
		TR62328_c4_g1_i1_6			x		x
		TR62328_c4_g1_i1_5			x		x
		TR3746_c0_g1_i1_1			x		x
	microtubule associated protein	TR63017_c7_g1_i1_4			x
		TR63017_c7_g1_i4_6			x
	Mitofusin-2 [Strongylocentrotus purpuratus]	TR58618_c0_g1_i1_4		x
	Myophilin	TR57233_c0_g1_i1_1		x	x	x	x
	Myosin	TR54747_c4_g1_i1_6		x	x	x	x
		TR45553_c0_g1_i1_2		x	x	x	x
		TR45553_c0_g2_i1_2		x	x	x	x
		TR61479_c1_g2_i1_1		x	x	x	x
		TR45553_c0_g1_i4_2		x	x	x	x
		TR61479_c1_g1_i1_1		x	x	x	x
		TR45553_c0_g1_i2_2		x	x	x	x
		TR54747_c4_g1_i2_5			x	x	x
		TR45553_c0_g1_i3_2					x
		TR17149_c0_g1_i1_3			x	x	x
		TR85591_c0_g1_i1_1				x	x
		TR6130_c0_g1_i1_5				x
	Myosin-10 isoform	TR63506_c0_g1_i1_3			x	x	x
		TR63506_c0_g2_i1_3			x	x	x
		TR63506_c0_g2_i1_2			x	x	x
	Myosin heavy chain	TR63506_c2_g1_i1_1		x	x	x	x
		TR63506_c3_g1_i4_6		x	x	x	x
		TR63506_c2_g2_i1_1			x	x	x
		TR63506_c3_g1_i1_4			x	x	x
	Myosin light chain kinase, smooth muscle	TR56692_c1_g1_i1_5		x	x	x	x
		TR9362_c0_g1_i1_1		x	x	x
	Myosin-10 isoform X1 [Strongylocentrotus purpuratus]	TR19795_c0_g1_i1_2		x	x	x	x
	Plasminogen	TR27217_c0_g1_i1_5		x	x	x	x
		TR83449_c0_g1_i1_1		x	x	x	x
	Plastin	TR60944_c1_g1_i1_6		x	x	x	x
		TR94728_c0_g1_i1_1		x	x	x	x
	Profilin	TR50873_c2_g1_i1_2		x	x	x	x
	Radixin	TR58417_c2_g1_i1_6		x	x	x	x
		TR32358_c0_g1_i2_3		x	x	x	x
		TR32358_c0_g1_i3_3		x		x	x
		TR32358_c0_g1_i1_3		x		x	x
		TR57945_c0_g1_i1_6		x	x	x
		TR57945_c0_g1_i2_5		x	x
		TR70524_c0_g1_i1_4					x
		TR58417_c2_g1_i4_6			x	x	x
	Ras GTPase-activating-like protein IQGAP3	TR63834_c1_g1_i3_6		x	x	x	x
		TR63834_c1_g1_i5_6		x		x	x
		TR63834_c1_g1_i4_5				x	x
		TR97589_c0_g1_i1_1		x	x	x
	Ras GTPase-activating-like protein rng2	TR63834_c1_g1_i2_6		x	x	x	x
	Ras homolog gene family, member [Strongylocentrotus purpuratus]	TR55105_c10_g2_i4_5		x	x	x
		TR55105_c10_g2_i1_4		x	x	x	x
		TR55105_c10_g2_i3_5		x	x	x
		TR66804_c0_g1_i1_1		x	x
		TR55105_c5_g1_i1_1		x	x	x
	Ras-related protein Rap-1A	TR63284_c8_g1_i2_6		x	x	x	x
		TR40699_c0_g1_i1_2		x	x	x	x
		TR59166_c0_g1_i1_2		x	x	x	x
	Ras-related protein R-Ras	TR23933_c0_g1_i1_6				x
	Ras-related protein Rab-7a	TR58992_c4_g1_i2_6		x	x	x	x
		TR80122_c0_g1_i1_5					x
	RAs-related protein Rab-5B [Strongylocentrotus purpuratus]	TR63999_c7_g1_i3_4		x	x	x
		TR73107_c0_g1_i1_3		x	x	x	x
	Regulator of microtubule dynamics protein 3	TR63314_c5_g1_i1_6		x	x
		TR63754_c2_g5_i11_6			x		x
	Scavenger receptor cysteine-rich type 1	TR22060_c0_g1_i1_4		x	x	x	x
	Septin-11	TR55271_c1_g1_i1_6		x	x	x	x
		TR55271_c1_g1_i2_4		x	x	x	x
	Septin-7	TR57903_c4_g1_i10_5		x	x	x	x
		TR57903_c3_g1_i1_2		x	x	x	x
		TR57903_c4_g1_i8_5		x		x	x
	Sorting nexin-6 isoform X4 [Strongylocentrotus purpuratus]	TR57073_c0_g1_i1_4		x	x	x	x
		TR50047_c4_g1_i1_3		x	x
	Spectrin alpha chain, non-erythrocytic 1 isoform X9 [Strongylocentrotus purpuratus]	TR63244_c7_g1_i2_4		x	x	x	x
		TR63244_c7_g1_i3_4		x	x	x
		TR63244_c5_g1_i1_3		x	x	x	x
		TR63244_c5_g1_i2_3		x	x	x	x
		TR63244_c7_g1_i1_6		x	x	x	x
		TR63244_c0_g1_i1_1		x	x	x	x
		TR41090_c0_g2_i1_5		x		x
		TR41657_c0_g1_i1_6		x	x	x
	Spectrin beta chain	TR60097_c2_g1_i1_5		x	x	x	x
		TR60097_c1_g1_i1_1		x	x	x	x
		TR60097_c0_g1_i1_2		x	x	x	x
		TR6516_c0_g1_i1_1		x	x	x	x
		TR60097_c4_g1_i1_3		x
	Talin-2	TR63305_c0_g1_i2_4		x	x	x	x
	Transgelin	TR51477_c1_g1_i2_3		x	x	x	x
		TR51477_c1_g1_i1_2		x	x	x	x
		TR55278_c0_g1_i1_6		x	x	x	x
		TR44618_c0_g1_i1_6		x	x	x	x
		TR55278_c0_g1_i2_6		x		x
	Translationally-controlled tumor protein homolog [Strongylocentrotus purpuratus]	TR64046_c17_g1_i1_5		x	x	x	x
	Tropomyosin	TR44738_c0_g1_i4_1		x	x	x	x
		TR44738_c0_g1_i2_2		x	x	x	x
		TR55272_c1_g1_i2_5		x	x	x	x
		TR55272_c1_g1_i3_5		x	x	x	x
		TR44738_c0_g1_i3_1		x	x	x	x
		TR44738_c0_g1_i1_2		x	x	x	x
		TR31340_c0_g1_i1_6		x	x	x
		TR44738_c0_g2_i1_1		x	x	x
	Tropomyosin (SP)	TR58895_c0_g1_i1_6		x	x	x	x
		TR10460_c0_g1_i1_2		x	x	x	x
		TR25258_c0_g2_i1_1		x	x	x	x
		TR25258_c0_g1_i1_2		x	x	x	x
		TR57499_c4_g1_i2_3		x		x
	Tubulin	TR42634_c0_g1_i1_6		x	x	x	x
		TR63885_c5_g4_i4_6		x	x	x	x
		TR63885_c5_g4_i2_6		x	x	x	x
		TR44979_c0_g1_i3_5		x	x	x	x
		TR63868_c15_g2_i2_6		x	x	x	x
		TR63885_c4_g1_i1_4		x	x	x	x
		TR63868_c19_g1_i10_2		x	x	x	x
		TR57413_c5_g1_i2_3		x	x	x	x
		TR37452_c0_g1_i1_4		x	x	x	x
		TR63885_c5_g3_i1_6		x	x		x
		TR77381_c0_g1_i1_5		x	x	x	x
		TR63885_c5_g5_i3_4		x	x	x	x
		TR63885_c5_g5_i4_4		x	x	x	x
		TR63885_c5_g5_i6_4		x	x	x	x
		TR63885_c5_g5_i1_4		x	x	x	x
		TR57413_c5_g1_i1_1		x	x	x	x
		TR30808_c0_g1_i1_4		x	x	x	x
		TR57413_c3_g2_i1_6		x	x	x	x
		TR57413_c3_g1_i1_6		x	x	x	x
		TR57413_c5_g1_i8_1		x	x	x	x
		TR63868_c15_g2_i1_6		x	x	x	x
		TR57413_c6_g1_i4_4		x	x	x	x
		TR63885_c5_g4_i1_6		x	x	x	x
		TR63885_c5_g2_i2_4		x	x		x
		TR63868_c19_g1_i11_2		x	x		x
		TR20188_c0_g1_i1_5		x	x	x	x
		TR63885_c5_g2_i1_4		x	x	x	x
		TR63868_c19_g1_i9_2		x	x		x
		TR57413_c5_g1_i10_3		x	x	x	x
		TR28918_c0_g1_i1_6		x	x	x	x
		TR63868_c16_g1_i1_5		x	x	x	x
		TR19249_c0_g1_i1_5		x	x	x	x
		TR63885_c5_g1_i1_6		x	x		x
		TR66215_c0_g1_i1_4		x	x	x	x
		TR57413_c4_g1_i1_6		x	x	x	x
		TR63885_c6_g1_i1_4		x	x	x	x
		TR74581_c0_g1_i1_6		x	x	x	x
		TR57413_c6_g1_i1_4		x	x	x	x
		TR24066_c0_g1_i1_5		x	x	x	x
		TR63885_c4_g2_i1_4		x	x	x	x
		TR24066_c1_g2_i1_4		x	x	x	x
		TR101610_c0_g1_i1_4		x	x	x	x
		TR44979_c0_g1_i1_5		x
		TR42422_c0_g1_i1_5		x	x	x	x
		TR44979_c0_g1_i2_5		x	x		x
		TR67436_c0_g1_i1_4		x		x	x
		TR44979_c0_g1_i2_6		x	x	x	x
		TR30332_c0_g1_i1_1		x	x	x	x
		TR57413_c6_g1_i3_6		x	x	x	x
		TR57413_c6_g1_i2_6		x	x	x	x
		TR63868_c0_g1_i1_3		x	x	x	x
	Tubulin	TR60215_c5_g2_i6_1		x	x	x	x
		TR42793_c1_g1_i1_4		x	x	x	x
		TR60215_c5_g2_i1_1		x	x	x	x
		TR62695_c3_g2_i2_4		x	x	x	x
		TR60215_c4_g2_i2_4		x	x	x	x
		TR62695_c3_g7_i1_4		x	x	x	x
		TR32565_c0_g1_i1_4		x	x	x	x
		TR60215_c5_g2_i5_1		x	x	x	x
		TR15011_c0_g1_i1_4		x	x	x	x
		TR60215_c4_g1_i2_6		x	x	x	x
		TR9467_c0_g2_i1_6		x	x	x	x
		TR34617_c0_g1_i1_4		x	x	x	x
		TR48914_c0_g1_i1_4		x	x	x	x
		TR8300_c0_g1_i1_5		x	x	x	x
		TR48539_c0_g1_i1_5		x	x	x	x
		TR60215_c5_g1_i2_1		x	x	x	x
		TR687_c0_g1_i1_6		x	x	x	x
		TR34770_c0_g1_i1_5		x		x
		TR62695_c3_g4_i1_6		x	x	x	x
		TR36570_c0_g1_i1_4		x	x	x	x
		TR62695_c3_g2_i6_5		x	x	x	x
		TR60215_c5_g2_i2_1		x	x	x	x
		TR60215_c5_g2_i3_1		x	x	x	x
		TR62695_c3_g2_i8_4		x	x	x	x
		TR60215_c5_g3_i1_3		x	x	x	x
		TR60215_c1_g1_i1_6		x	x	x	x
		TR70161_c0_g1_i1_6		x	x	x	x
		TR62695_c3_g3_i1_5		x	x	x	x
		TR60215_c5_g2_i8_3		x	x	x	x
		TR9489_c0_g1_i1_4		x	x
		TR31_c0_g1_i1_5		x	x	x	x
		TR17636_c0_g1_i1_4		x	x	x	x
		TR57984_c0_g1_i9_2		x	x	x
		TR57984_c0_g1_i8_2		x	x	x	x
		TR62695_c3_g2_i1_6		x	x	x	x
		TR60215_c4_g1_i3_6		x	x	x	x
		TR55393_c3_g3_i1_4		x	x	x	x
		TR48914_c0_g1_i2_4		x	x
		TR42793_c1_g1_i2_4		x	x	x	x
		TR57984_c0_g1_i10_3		x
		TR62695_c3_g5_i1_4		x	x	x	x
		TR60215_c5_g1_i1_1		x	x	x	x
		TR62695_c3_g1_i1_4		x	x	x	x
		TR62695_c2_g1_i1_6		x	x	x	x
		TR23860_c0_g1_i1_6		x	x	x	x
		TR62695_c3_g1_i2_4		x	x	x	x
		TR24092_c0_g1_i1_5		x	x	x	x
		TR60424_c4_g1_i1_6		x	x	x	x
		TR42793_c0_g1_i1_4		x	x	x	x
		TR7551_c0_g1_i1_5		x	x	x	x
		TR19677_c0_g1_i1_5		x		x	x
		TR16442_c0_g1_i1_4		x	x	x	x
		TR95067_c0_g1_i1_6		x	x	x	x
		TR42672_c1_g1_i1_6		x		x
		TR60215_c4_g2_i1_4		x	x	x	x
		TR57984_c0_g1_i4_2		x	x		x
		TR9467_c0_g1_i1_4			x		x
		TR22216_c0_g1_i1_2				x
	Twinfilin-1	TR57031_c9_g2_i2_4		x	x	x	x
		TR57031_c9_g2_i1_6		x	x	x	x
		TR57031_c9_g2_i1_4			x	x	x
	Unconventional myosin-VI-like isoform X3 [Strongylocentrotus purpuratus]	TR63190_c4_g1_i2_4		x	x	x
		TR63190_c4_g1_i1_5		x
	Vinculin	TR59955_c1_g1_i2_6		x	x	x	x
		TR59955_c1_g1_i3_6		x	x	x	x
		TR59955_c1_g1_i4_6		x	x	x	x
		TR70576_c0_g1_i1_2		x	x	x	x
		TR59955_c1_g1_i7_6		x	x
		TR59955_c1_g1_i1_6		x	x
	Villin	TR61587_c1_g1_i2_5		x	x	x	x
		TR61587_c2_g1_i1_2		x	x	x	x
		TR61587_c0_g1_i1_3		x	x	x	x
		TR61587_c1_g1_i3_5		x	x
		TR44649_c0_g1_i1_6		x	x	x	x
		TR65054_c0_g1_i1_2		x	x
		TR61587_c1_g1_i1_5		x	x	x	x
	Dystroglycan	TR62309_c3_g1_i1_5			x	x	x
	cell wall protein [SP]	TR40012_c0_g1_i1_6			x	x	x
	Fibulin 1	TR62216_c4_g1_i3_4			x		x
		TR62216_c4_g1_i4_4			x		x
	Fibrosurfin [PL]	TR7266_c0_g1_i1_6			x
	syntenin-1 [SP]	TR62251_c8_g1_i2_3			x	x	x
Homeostasis	arf-GAP with dual PH domain-containing protein 1 isoform X2 [Strongylocentrotus purpuratus]	TR50359_c3_g8_i1_5		x	x	x	x
	ADP-ribosylation factor 1	TR57967_c2_g1_i10_5		x	x	x	x
		TR57967_c2_g1_i15_6		x	x	x	x
		TR57967_c0_g1_i1_2		x	x	x	x
		TR54054_c3_g1_i1_6		x	x	x	x
		TR57967_c0_g1_i2_2		x	x	x	x
		TR93798_c0_g1_i1_1		x	x	x	x
		TR63700_c3_g1_i1_5		x	x	x	x
		TR71585_c0_g1_i1_4		x	x		x
		TR50110_c0_g1_i1_3		x	x	x	x
		TR57967_c2_g1_i1_6			x	x
	ADP-ribosylation factor like protein	TR55660_c5_g1_i2_6					x
		TR55660_c5_g1_i1_4					x
	ATP synthase subunit gamma	TR46125_c0_g1_i1_4		x	x	x	x
		TR17381_c0_g2_i1_3		x	x	x	x
		TR17381_c0_g1_i1_3				x	x
		TR7052_c0_g1_i1_3		x	x
	BTB/POZ domain-containing protein KCTD16	TR50997_c0_g1_i1_6		x	x	x	x
	BTB/POZ domain-containing protein KCTD4	TR50723_c3_g3_i4_6		x	x	x	x
		TR50723_c3_g3_i7_6		x	x
		TR16747_c0_g1_i1_2		x	x	x
	calcium-binding mitochondrial carrier protein Aralar1 isoform X2 [Strongylocentrotus purpuratus]	TR61734_c0_g1_i2_4		x	x	x	x
	Calcium/calmodulin-dependent protein kinase type II subunit alpha	TR62508_c2_g1_i2_4		x	x	x	x
		TR62508_c2_g1_i1_4		x	x	x	x
		TR62508_c2_g1_i4_4		x	x	x	x
		TR62508_c2_g1_i1_5		x	x	x	x
	Calcyphosin	TR63223_c5_g1_i2_5		x	x	x	x
		TR63223_c6_g1_i1_2		x	x	x	x
		TR63223_c5_g1_i3_6			x		x
	Calmodulin	TR62630_c7_g3_i8_5		x	x	x	x
		TR62630_c7_g3_i12_5		x	x	x	x
		TR62630_c0_g1_i1_2		x	x	x	x
	Calreticulin	TR56630_c5_g1_i1_4		x	x	x	x
		TR56630_c4_g1_i1_1		x	x	x	x
		TR56630_c3_g1_i1_3		x	x	x	x
	cAMP-dependent protein kinase type II regulatory subunit [Strongylocentrotus purpuratus]	TR58758_c0_g1_i12_5		x
		TR58758_c0_g1_i7_4		x		x
		TR58758_c0_g1_i10_5		x	x	x
		TR58758_c1_g1_i1_2		x		x
		TR5921_c0_g1_i1_1		x		x
		TR58758_c0_g1_i11_6		x	x	x
	Cell division cycle 42 (GTP binding protein, 25kDa)-like [Strongylocentrotus purpuratus]	TR42868_c0_g1_i1_3		x	x	x	x
		TR56498_c2_g1_i1_4		x	x	x
		TR56498_c1_g1_i1_2		x	x	x	x
		TR56075_c1_g1_i1_6		x	x	x
		TR56075_c4_g1_i3_6		x	x	x	x
	charged multivesicular body protein 2a [Strongylocentrotus purpuratus]	TR51035_c3_g3_i1_6			x		x
		TR51035_c0_g1_i1_3			x	x	x
		TR2489_c0_g1_i1_3			x		x
	Chloride intracellular channel protein 4	TR61667_c4_g5_i1_5		x	x	x	x
		TR61667_c0_g1_i1_3		x	x	x
	Colossin-A	TR63538_c1_g1_i1_5		x	x	x	x
		TR49338_c0_g1_i1_1			x
	cystathionine gamma-lyase	TR60873_c2_g2_i1_4					x
	dual oxidase maturation factor 1 isoform X3 [Strongylocentrotus purpuratus]	TR60524_c2_g1_i2_2		x
		TR60524_c2_g1_i1_2		x	x	x	x
	endophilin-A3 isoform X1 [Strongylocentrotus purpuratus]	TR54821_c1_g1_i1_6		x	x	x
	extracellular matrix protein 3-like [Strongylocentrotus purpuratus]	TR63115_c7_g6_i1_4		x	x	x	x
	Extracellular matrix protein	TR63115_c7_g1_i1_4		x	x	x	x
		TR63115_c4_g1_i1_3		x	x	x	x
	fibrous sheath CABYR-binding protein isoform X1 [Strongylocentrotus purpuratus]	TR26732_c0_g1_i1_4		x		x
	Flotillin-2	TR59930_c4_g2_i1_4		x	x	x	x
		TR59930_c4_g2_i2_6		x	x	x	x
		TR59930_c2_g1_i1_2		x		x	x
		TR59930_c0_g1_i1_3		x	x	x	x
		TR59930_c0_g2_i1_3				x	x
	Glutamate receptor	TR54628_c0_g1_i1_4		x	x	x	x
		TR81438_c0_g1_i1_1		x	x	x	x
		TR20469_c0_g1_i1_2		x	x	x	x
		TR4624_c0_g1_i1_1		x	x	x
		TR20469_c0_g1_i2_2		x	x	x
		TR84216_c0_g1_i1_1		x	x	x	x
	Glutamate receptor 1	TR60953_c2_g1_i1_6		x	x	x	x
		TR60953_c2_g1_i3_4		x	x	x	x
		TR17190_c0_g1_i2_1		x	x	x
		TR60953_c1_g1_i1_1		x	x	x	x
		TR17190_c0_g1_i1_1		x	x	x	x
		TR22287_c0_g1_i1_2		x	x	x	x
		TR16118_c0_g1_i1_2		x	x	x	x
		TR60953_c3_g1_i1_2		x	x
		TR60953_c2_g1_i4_4			x		x
	Hephaestin	TR64390_c6_g1_i1_6		x	x	x	x
		TR82384_c0_g1_i1_3		x	x	x	x
		TR88081_c0_g1_i1_3		x	x	x	x
	Kremen protein 1	TR59471_c1_g1_i1_6		x	x	x	x
		TR60635_c6_g1_i8_1		x	x	x	x
	long-chain-fatty-acid--CoA ligase 3 [Strongylocentrotus purpuratus]	TR54640_c1_g1_i2_5		x
	Magnesium transporter protein 1	TR56961_c3_g3_i3_6		x	x	x	x
	melanotransferrin	TR54051_c0_g1_i1_4		x	x	x	x
		TR8392_c0_g1_i1_1		x	x	x	x
		TR63268_c8_g1_i1_3		x	x
		TR16519_c0_g1_i1_3		x	x	x	x
		TR63268_c8_g1_i1_3				x
	MICAL-like protein 1 isoform X1 [Strongylocentrotus purpuratus]	TR61919_c4_g1_i10_6		x	x	x	x
		TR83098_c0_g1_i1_2		x	x
		TR61919_c4_g1_i14_5		x	x	x
	Mitogen-activated protein kinase 14A	TR46948_c0_g1_i1_4		x	x	x	x
		TR88690_c0_g1_i1_1		x	x	x	x
	N(G),N(G)-dimethylarginine dimethylaminohydrolase 2	TR56394_c0_g1_i1_5		x	x	x	x
		TR56394_c0_g1_i2_4		x	x	x	x
		TR78237_c0_g1_i1_1		x	x	x	x
	non-specific lipid-transfer protein [Strongylocentrotus purpuratus]	TR59069_c2_g1_i1_6		x	x	x
		TR59069_c1_g1_i1_2		x	x	x
	non-specific lipid-transfer protein [Strongylocentrotus purpuratus]	TR56243_c0_g1_i1_6		x	x	x
		TR56243_c1_g1_i1_1		x
	Plasma membrane calcium-transporting ATPase	TR63736_c4_g1_i1_5		x	x	x	x
		TR87911_c0_g1_i1_5		x	x	x	x
	Phosphate carrier protein, mitochondrial	TR54955_c2_g1_i1_5		x	x	x	x
		TR89490_c0_g1_i1_2		x	x	x	x
		TR38308_c0_g1_i1_5		x			x
	Probable cytosol aminopeptidase	TR58209_c0_g1_i1_6		x	x	x	x
	putative aminopeptidase	TR58948_c2_g1_i2_6
	Probable mitochondrial-processing peptidase subunit alpha-2	TR56019_c0_g1_i1_6		x	x	x	x
	Prohibitin	TR49939_c0_g1_i1_5		x	x	x	x
	Protein NDRG1	TR61299_c2_g1_i1_6		x	x	x	x
		TR61299_c0_g1_i1_2		x	x	x	x
		TR61299_c2_g1_i3_5			x	x	x
	Prolow-density lipoprotein receptor-related protein	TR56645_c1_g1_i2_6		x	x	x	x
		TR56645_c1_g1_i7_6		x	x	x	x
		TR56645_c1_g1_i10_4		x	x	x	x
		TR56645_c1_g1_i9_4			x	x
	Rab GDP dissociation inhibitor alpha	TR64098_c10_g3_i1_6		x	x	x	x
		TR53954_c0_g1_i1_6		x	x	x	x
	receptor expression-enhancing protein 5 isoform X1 [Strongylocentrotus purpuratus]	TR24591_c0_g1_i1_5		x	x
		TR34054_c0_g1_i1_2		x	x	x
		TR28418_c0_g1_i1_2		x	x
	Rho GTPase-activating protein 35	TR56333_c1_g1_i2_4		x	x	x
	rho GTPase-activating protein 8-like isoform X2	TR54856_c0_g1_i1_6			x		x
	Rho GDP-dissociation inhibitor	TR20130_c0_g1_i2_1		x	x	x	x
		TR20130_c0_g1_i1_2		x	x	x	x
	salivary glue protein Sgs-3 [Strongylocentrotus purpuratus]	TR56209_c2_g1_i1_4		x	x	x	x
	Sarcoplasmic/endoplasmic reticulum calcium ATPase	TR62501_c1_g1_i1_6		x	x	x	x
		TR62501_c1_g1_i2_5		x	x	x	x
		TR97834_c0_g1_i1_4				x
	Serine/threonine-protein phosphatase PP1-beta	TR59270_c2_g1_i1_6		x	x	x	x
		TR61124_c1_g1_i1_5		x	x	x	x
		TR7724_c1_g1_i1_6		x	x		x
		TR44663_c0_g1_i1_5		x	x		x
		TR86381_c0_g1_i1_1		x
		TR7724_c0_g1_i1_4			x		x
	Serine/threonine-protein phosphatase 2A catalytic subunit beta isoform	TR61684_c1_g1_i1_5		x	x	x
		TR60535_c1_g1_i1_6		x	x	x
	Serine/threonine-protein phosphatase 2B catalytic subunit beta isoform	TR57262_c0_g1_i1_6		x	x	x	x
	Serine/threonine-protein phosphatase 2A 65 kDa regulatory subunit A beta isoform	TR36128_c0_g1_i1_5		x	x	x	x
	Sodium/calcium exchanger 1	TR63164_c2_g1_i8_5		x	x	x
		TR63164_c2_g1_i1_4		x	x	x	x
		TR67585_c0_g1_i1_3		x	x	x	x
	Sodium/potassium-transporting ATPase subunit alpha	TR62866_c3_g1_i1_4		x	x	x	x
		TR62866_c2_g1_i1_3		x	x	x	x
		TR9396_c0_g1_i1_3		x	x	x	x
		TR53598_c0_g2_i2_4		x	x	x	x
		TR62866_c2_g2_i1_1		x	x	x	x
	Sodium/potassium-transporting ATPase subunit beta-2	TR50472_c2_g1_i1_4		x	x	x	x
		TR92117_c0_g1_i1_1		x	x	x	x
		TR15791_c0_g1_i1_3		x		x	x
	sodium- and chloride-dependent glycine transporter 1-like isoform X2 [Lytechinus variegatus]	TR54792_c1_g1_i1_4			x	x
	Succinate dehydrogenase [ubiquinone] flavoprotein subunit, mitochondrial	TR58959_c0_g1_i1_6		x	x	x	x
		TR21044_c0_g2_i1_5		x		x
		TR21044_c1_g1_i1_6		x	x	x	x
	succinate--CoA ligase [ADP/GDP-forming] subunit alpha, mitochondrial	TR54957_c1_g1_i1_4		x
		TR54957_c0_g1_i1_2		x
	Tetraspanin-11	TR59264_c1_g1_i1_5		x	x	x
	Toposome [PL]	TR62360_c0_g1_i1_5		x	x	x	x
		TR62360_c0_g1_i2_5		x	x	x
	Tyrosine-protein kinase Fyn	TR62124_c0_g1_i3_4		x	x	x	x
	tyrosine--tRNA ligase, cytoplasmic [Strongylocentrotus purpuratus]	TR57854_c1_g1_i1_5			x
	transmembrane 9 superfamily member 3 [Strongylocentrotus purpuratus]	TR61781_c2_g2_i3_4		x	x	x	x
	transmembrane 9 superfamily	TR59609_c2_g1_i2_6			x
	Transitional endoplasmic reticulum ATPase	TR62273_c2_g1_i1_5		x	x	x	x
		TR65433_c0_g1_i1_4		x	x	x	x
		TR75102_c0_g1_i1_4		x	x	x	x
		TR7142_c0_g1_i1_1		x	x
		TR78326_c0_g1_i1_1		x	x	x	x
	Trifunctional enzyme subunit alpha, mitochondrial	TR58114_c0_g1_i1_4		x	x	x	x
	UPF0577 protein KIAA1324-like isoform X1 [Strongylocentrotus purpuratus]	TR61134_c1_g1_i2_4		x	x	x	x
	UPF0577 protein KIAA1324-like isoform X2 [Strongylocentrotus purpuratus]	TR61134_c1_g1_i3_6		x	x		x
		TR61134_c1_g1_i1_5		x	x		x
		TR4321_c0_g1_i1_1		x	x
	Very low-density lipoprotein receptor	TR62408_c6_g2_i1_4		x	x	x	x
		TR80905_c0_g1_i1_1		x	x
	Voltage-dependent anion-selective channel protein 2	TR54143_c2_g1_i1_6		x	x	x	x
		TR30517_c0_g1_i1_1		x	x	x	x
		TR54143_c1_g1_i1_3		x	x	x	x
		TR54143_c1_g2_i1_3		x	x	x	x
		TR30517_c0_g2_i1_3		x	x	x	x
		TR30517_c0_g1_i2_1			x
	Erlin-2	TR62373_c0_g1_i1_5			x		x
	Fasciclin 2	TR58553_c3_g2_i2_4			X
		TR84271_c0_g1_i1_2			x
		TR99742_c0_g1_i1_1			x
	calcium-activated chloride channel regulator	TR61571_c1_g1_i1_4			x
		TR61571_c1_g1_i3_4			x
	protein Skeletor	TR58510_c6_g1_i1_5			x	x
		TR88330_c0_g1_i1_2			x	x
		TR18482_c0_g1_i1_3			x
	Dipeptidyl peptidase [SP]	TR55839_c4_g2_i2_5			x
		TR55839_c4_g2_i1_5			x
		TR30467_c0_g1_i1_2			x
	voltage-dependent calcium channel	TR60722_c0_g1_i1_5			x	x
		TR60722_c0_g1_i3_5			x
	D-3-phosphoglycerate dehydrogenase	TR58882_c0_g1_i1_5			x	x	x
		TR57048_c1_g1_i3_2			x	x
	procollagen galactosyltransferase 2	TR53916_c0_g1_i1_5			x
	protein MOTHER of FT and TFL1-like [Strongylocentrotus purpuratus]	TR54811_c1_g1_i2_5			x
		TR54811_c1_g1_i1_5			x
	adhesion G-protein coupled receptor	TR59418_c0_g1_i3_5			x	x
	hepatocyte growth factor receptor	TR60789_c3_g2_i2_4			x		x
	phospholipase C delta	TR63401_c1_g4_i1_6			x		x
	acyl-CoA dehydrogenase family member 9, mitochondrial	TR57949_c0_g2_i1_5			x
		TR57949_c0_g2_i2_5			x
	alpha-centratin	TR63448_c3_g2_i1_5			x
		TR64008_c3_g2_i1_5			x
	nicotinamide phosphoribosyltransferase [Strongylocentrotus purpuratus]	TR53693_c0_g1_i1_6			x	x	x
	ALG-2 interacting protein z8Paracentrotus lividus]	TR62649_c1_g1_i3_5			x
	iron sulfur domain-containing protein	TR52892_c2_g1_i1_4			x
		TR52892_c0_g1_i1_1			x
		TR52892_c2_g1_i3_4			x
	S-crystallin SL11-like	TR8277_c0_g1_i1_5			x	x	x
		TR28280_c0_g1_i1_5			x	x	x
	S-crystallin SL11	TR53336_c4_g1_i1_5			x	x	x
	acid ceramidase	TR59767_c0_g1_i1_4			x
		TR59767_c0_g1_i2_6			x
	excitatory amino acid transporter 1 [Strongylocentrotus purpuratus]	TR9989_c0_g1_i1_3			x
	beta-D-xylosidase	TR58506_c0_g1_i1_6			x	x
	sialidase-1	TR54189_c0_g1_i1_6			x
		TR54189_c0_g1_i3_4			x
	angiotensin-converting enzyme	TR59927_c11_g2_i1_5			x
	palmitoyl-protein thioesterase 1	TR48845_c0_g1_i1_6			x
	dipeptidyl peptidase 2	TR55504_c6_g1_i10_5			x
		TR55504_c6_g1_i8_5			x
		TR55504_c6_g1_i3_5			x
	4-aminobutyrate aminotransferase, mitochondrial	TR62364_c4_g1_i1_6			x
	putative ferric-chelate reductase 1 isoform X3	TR60626_c12_g2_i2_4			x
	spicule matrix protein SM29 precursor [Strongylocentrotus purpuratus]	TR47971_c0_g1_i1_6			x
	phospholipid scramblase 2 isoform X1	TR61849_c3_g1_i10_5			x
		TR61849_c3_g1_i12_5			x
	Sorcin isoform	TR52897_c1_g1_i1_5			x		x
	IST1 homolog isoform X3	TR51168_c0_g1_i1_6			x
	NPC intracellular cholesterol transporter 2 homolog a [Strongylocentrotus purpuratus]	TR61871_c1_g1_i1_4			x
	ATP-binding cassette	TR63007_c1_g1_i11_6			x
		TR60303_c5_g1_i3_6			x
	Nicastrin-like	TR55813_c0_g1_i1_5			x
	Glutaredoxin	TR57010_c1_g2_i1_5			x
		TR63419_c1_g1_i1_5			x
	Neutral alpha-glucosidase C	TR59124_c0_g1_i1_6				x	x
	GDH/6PGL endoplasmic bifunctional protein isoform X1 [Strongylocentrotus purpuratus]	TR57956_c0_g1_i1_4		x	x
	FRAS1-related extracellular matrix protein 3	TR63115_c7_g2_i1_4				x	x
Nervous System	Band 4.1-like protein 1	TR63426_c3_g1_i3_5		x	x	x	x
		TR29459_c0_g1_i1_2		x	x	x	x
		TR26929_c0_g1_i1_1				x	x
		TR63426_c1_g1_i1_1			x
	Contactin-3	TR58869_c1_g1_i1_4		x	x	x	x
		TR58869_c1_g1_i2_4				x
	Cholinesterase	TR59004_c0_g1_i1_5		x	x	x
		TR61706_c0_g1_i10_5		x	x	x
		TR61706_c0_g1_i1_4		x
		TR80924_c0_g1_i1_3		x
		TR61706_c0_g1_i3_5		x
		TR61706_c0_g1_i2_6		x
		TR61706_c0_g1_i5_5		x
		TR61706_c0_g1_i3_4		x
	cholinesterase	TR52195_c1_g1_i1_5			x	x	x
	cholinesterase 1	TR49108_c0_g1_i2_4			x
		TR20664_c0_g1_i1_5			x
	cholinesterase 1-like [Strongylocentrotus purpuratus]	TR59004_c0_g1_i2_5			x
		TR61706_c0_g1_i10_5			x	x
	Deleted in malignant brain tumors 1 protein	TR41597_c0_g1_i1_4		x	x	x
		TR61210_c2_g2_i1_5		x	x
	deleted in malignant brain tumors	TR62350_c1_g1_i3_5			x
		TR62350_c1_g1_i1_4			x
	deleted in malignant brain tumors 1 protein isoform X1 [Strongylocentrotus purpuratus]	TR50957_c0_g1_i2_5			x
	Metabotropic glutamate receptor 3	TR61975_c0_g1_i2_4		x	x	x	x
	N-acetylated-alpha-linked acidic dipeptidase 2	TR55087_c0_g1_i1_4		x	x	x	x
	Neuroblast differentiation-associated protein AHNAK-like isoform X25 [Lytechinus variegatus]	TR52734_c0_g2_i1_4		x	x
		TR52734_c0_g1_i1_6		x	x
		TR52734_c2_g1_i10_6		x
	neuroblast differentiation-associated protein AHNAK-like isoform X25 [Lytechinus variegatus]	TR22598_c0_g1_i1_6		x	x	x	x
	Neuroblast differentiation [Lytechinus variegatus]	TR52734_c1_g1_i1_5			x	x	x
	neuroblast differentiation-associated protein AHNAK-like isoform X48 [Lytechinus variegatus]	TR40768_c0_g1_i1_4		x	x		x
	Neuronal cell adhesion molecule	TR63939_c4_g1_i2_6		x	x	x	x
	neuronal-specific septin-3 isoform X1 [Strongylocentrotus purpuratus]	TR57683_c0_g1_i2_4		x	x	x	x
	Neurotrypsin	TR50957_c0_g1_i1_5		x	x	x	x
		TR53143_c4_g2_i1_6		x	x	x	x
	Neurotrypsin (SP)	TR56772_c0_g2_i2_5		x			x
	Neurotrypsin (SP)	TR56772_c0_g2_i4_4			x	x
	Neurotrypsin	TR52239_c4_g1_i7_5				x
		TR52239_c4_g1_i3_5				x
		TR52239_c4_g1_i1_5				x
	Neurotrypsin-like	TR50840_c0_g2_i1_5			x	x
	Receptor-type tyrosine-protein phosphatase delta	TR61540_c0_g1_i1_5		x	x	x	x
		TR61540_c0_g1_i2_6		x	x	x
	Semaphorin-6B	TR56844_c1_g1_i2_6		x	x	x	x
		TR56844_c1_g1_i1_6		x	x	x	x
		TR56844_c1_g1_i3_6		x	x
		TR56844_c1_g1_i5_6			x
	Semaphorin-1A	TR63404_c4_g1_i3_4				x
		TR63404_c4_g1_i1_5				x
		TR63404_c4_g1_i4_4
		TR63404_c4_g1_i2_4				x
	Transgelin-3-like isoform X1 [Strongylocentrotus purpuratus]	TR63559_c10_g1_i1_4		x	x	x
		TR25059_c0_g1_i1_1		x	x	x	x
		TR63559_c10_g1_i5_6				x	x
	neuroendocrine convertase	TR51195_c9_g3_i1_4			x
		TR51195_c9_g3_i3_4			x	x	x
		TR35880_c0_g1_i1_3			x		x
	Neurogenic locus notch homolog protein	TR62839_c2_g1_i2_5			x
		TR62839_c1_g1_i1_1			x
	cystein-rich motor neuro 1 protein like	TR56509_c2_g2_i1_4			x	x	x
	Mesencephalic astrocyte-derived neurotrophic factor homolog	TR41212_c0_g1_i1_5				x
Transcription process	cell cycle control protein 50A [Strongylocentrotus purpuratus]	TR58967_c4_g1_i1_6		x	x	x	x
	cytoplasmic aconitate hydratase isoform X2 [Strongylocentrotus purpuratus]	TR63443_c1_g1_i3_5		x		x
		TR63443_c1_g1_i2_6		x	x	x
		TR63443_c1_g1_i2_5		x	x		x
	Decapping nuclease rai1	TR45887_c2_g1_i1_6		x	x	x	x
		TR45887_c0_g1_i1_3		x	x	x	x
		TR45887_c3_g1_i1_3		x	x	x	x
	Heterogeneous nuclear ribonucleoprotein D-like	TR51767_c0_g1_i1_2		x	x	x	x
	Histone H1-delta	TR35102_c0_g1_i1_3		x	x	x	x
	Histone H2A	TR86890_c0_g1_i1_5			x
		TR47039_c3_g1_i1_5			x	x
		TR21418_c0_g1_i1_4			x
		TR47039_c0_g1_i1_3			x
		TR4823_c1_g1_i1_6			x
		TR87925_c0_g1_i1_4			x
	Histone H4	TR83409_c0_g1_i1_1		x	x	x	x
		TR62358_c5_g2_i2_1		x	x	x	x
		TR16946_c1_g1_i1_4		x	x	x	x
		TR53923_c2_g3_i1_4			x		x
	importin subunit beta-1 [Strongylocentrotus purpuratus]	TR61789_c0_g1_i1_6		x	x	x	x
	Late histone H2B	TR85352_c0_g1_i1_4		x	x	x	x
		TR62694_c1_g2_i3_6		x	x	x	x
	Leucine-rich repeat and fibronectin type-III domain-containing protein 2	TR60358_c5_g1_i1_6		x	x	x	x
		TR60358_c5_g2_i1_6		x		x	x
	Nucleolin	TR55191_c1_g1_i2_6		x	x	x	x
		TR55191_c1_g1_i1_6		x	x	x	x
		TR772_c0_g1_i1_1		x	x	x	x
		TR80502_c0_g1_i1_2			x
	Polyadenylate-binding protein 1	TR47047_c1_g1_i1_4		x	x	x	x
		TR88194_c0_g1_i1_2		x	x		x
		TR30273_c0_g1_i1_2		x	x	x	x
		TR47047_c0_g1_i1_2		x	x	x	x
		TR88194_c1_g1_i1_3			x
	Polypyrimidine tract-binding protein 1	TR52279_c0_g1_i1_4		x	x	x	x
		TR52279_c0_g1_i4_4		x		x
	poly(U)-specific endoribonuclease-A [Strongylocentrotus purpuratus]	TR49413_c0_g1_i1_4		x	x	x	x
		TR49413_c0_g1_i2_6					x
	Putative helicase MOV-10	TR63536_c3_g1_i1_6		x	x	x	x
		TR63536_c0_g1_i1_3		x		x
		TR63536_c4_g1_i1_4		x	x	x	x
	Putative 115 kDa protein in retrotransposable element	TR59368_c3_g1_i1_5		x	x	x	x
	Staphylococcal nuclease domain-containing protein 1	TR54596_c2_g1_i1_6		x	x	x	x
		TR54596_c2_g1_i3_5		x	x	x	x
		TR54596_c2_g1_i2_6			x	x	x
	WD repeat-containing protein (SP)	TR61280_c1_g1_i1_4		x	x	x	x
		TR1306_c0_g1_i1_2		x	x	x	x
		TR87727_c0_g1_i1_2		x	x	x
		TR61280_c2_g1_i1_2		x	x	x	x
	2-oxoglutarate dehydrogenase, mitochondrial	TR60976_c0_g1_i1_4		x	x	x
		TR96464_c0_g1_i1_6		x		x
	14-3-3-like protein 2 (SP)	TR45034_c5_g1_i1_5		x	x	x	x
		TR63478_c10_g1_i1_4		x	x	x	x
		TR63478_c10_g1_i2_4		x	x	x	x
		TR63478_c9_g2_i1_3		x	x	x	x
		TR54225_c0_g1_i1_1		x	x	x	x
		TR13030_c0_g1_i1_5		x	x	x	x
		TR63478_c9_g1_i1_1		x	x	x	x
		TR54225_c0_g1_i5_1		x	x	x	x
		TR45034_c5_g1_i2_5		x		x
	aspartate--tRNA ligase, cytoplasmic-like [Strongylocentrotus purpuratus]	TR58950_c0_g2_i2_6			x
		TR58950_c0_g2_i10_4			x
	eukaryotic initiation factor 4a [Strongylocentrotus purpuratus]	TR58529_c7_g10_i1_6			x	x	x
		TR93632_c0_g1_i1_2			x	x	x
		TR58518_c0_g1_i2_5				x
		TR58529_c4_g1_i1_3			x	x	x
	probable RNA polymerase II	TR52452_c0_g1_i1_6			x
Protein biosynthesis	Alanine-tRNA ligase	TR61760_c1_g1_i1_5		x	x	x
	Calnexin	TR56630_c6_g2_i1_5		x	x	x
		TR56630_c2_g1_i1_2		x	x	x
		TR13933_c0_g1_i1_3		x	x	x
		TR56630_c7_g1_i1_2		x	x	x
	Elongation factor 1-alpha	TR50690_c1_g1_i1_6		x	x	x	x
		TR43672_c0_g1_i3_3		x	x	x	x
		TR43672_c0_g1_i1_3		x	x	x	x
		TR18042_c0_g1_i1_6		x	x	x	x
		TR14794_c0_g1_i1_2		x	x	x	x
		TR50690_c1_g2_i1_6		x	x	x	x
		TR37806_c0_g1_i2_5		x	x	x	x
		TR27831_c0_g1_i1_4		x	x	x	x
		TR84579_c0_g1_i1_6		x	x	x	x
		TR20447_c0_g1_i1_4		x	x	x	x
		TR14794_c0_g2_i1_2		x	x		x
		TR43672_c0_g1_i2_1		x	x	x	x
		TR43672_c0_g1_i6_1		x	x	x	x
		TR94897_c0_g1_i1_4		x	x	x	x
		TR70597_c0_g1_i1_4			x	x	x
		TR72776_c0_g1_i1_4			x	x
	Elongation factor 2	TR60062_c2_g2_i1_4		x	x	x	x
		TR60407_c3_g2_i3_2		x	x	x	x
		TR100127_c0_g1_i1_5		x	x	x	x
		TR38661_c0_g1_i1_4		x	x	x	x
		TR2587_c0_g1_i1_5		x	x	x	x
		TR100394_c0_g1_i1_4		x	x	x	x
		TR60407_c3_g1_i1_3		x	x	x	x
		TR72733_c0_g1_i1_4		x	x	x	x
	eukaryotic peptide chain release factor GTP-binding subunit ERF3A [Strongylocentrotus purpuratus]	TR57978_c1_g1_i1_5		x	x	x	x
		TR10888_c0_g1_i1_6		x
	eukaryotic translation initiation factor 5A-1 [Strongylocentrotus purpuratus]	TR61906_c5_g1_i1_4		x	x	x	x
		TR51721_c0_g1_i1_4		x
	Eukaryotic translation initiation factor 2 subunit 1-like	TR58693_c0_g1_i1_5
		TR58693_c1_g1_i1_2
	DnaJ homolog subfamily C member 10	TR57409_c0_g1_i1_4		x	x	x	x
		TR57409_c0_g1_i2_6		x	x	x
		TR101830_c0_g1_i1_1		x	x	x
	Guanine nucleotide-binding protein subunit beta-2-like-1	TR48358_c1_g1_i1_5		x	x	x	x
		TR26504_c0_g1_i1_2		x	x	x	x
		TR23683_c0_g1_i1_2		x	x	x	x
		TR684_c0_g1_i1_3		x	x	x
		TR14611_c0_g1_i1_5		x	x	x	x
		TR99679_c0_g1_i1_4			x	x	x
		TR14611_c0_g1_i1_5				x	x
	guanine nucleotide-binding protein G(q) alpha subunit	TR36900_c0_g1_i1_6			x
	Peptidyl-prolyl cis-trans isomerase F, mitochondrial	TR43520_c1_g1_i1_6		x	x	x	x
		TR43520_c4_g1_i1_3		x	x	x	x
		TR43520_c4_g1_i2_3		x	x	x	x
		TR43520_c4_g2_i1_2		x	x	x	x
	Probable valine--tRNA ligase, cytoplasmic	TR53663_c5_g1_i1_6		x	x	x	x
		TR53663_c5_g1_i4_5		x	x	x
	protein disulfide-isomerase	TR54380_c4_g1_i1_6		x	x	x	x
		TR54380_c4_g1_i2_6		x	x
		TR54380_c0_g1_i1_1		x	x	x	x
		TR54380_c2_g1_i1_3		x	x	x	x
		TR25690_c0_g1_i1_5		x
	Protein disulfide isomerase A4-like (AR)	TR61118_c2_g1_i1_2		x	x	x	x
		TR61118_c4_g1_i11_5		x	x	x	x
	Protein disulfide isomerase	TR51358_c0_g2_i1_5		x	x	x	x
	Protein disulfide isomerase	TR59956_c4_g1_i1_5		x	x	x	x
		TR64835_c0_g1_i1_1		x	x	x	x
	Protein disulfide isomerase	TR63368_c0_g1_i1_4		x	x	x	x
	Protein disulfide isomerase	TR60838_c4_g3_i1_4		x	x	x	x
	Protein disulfide-isomerase	TR60501_c3_g1_i1_5		x	x	x
	Protein-glutamine gamma-glutamyltransferase K	TR59662_c0_g1_i1_5		x	x	x	x
		TR59662_c0_g1_i2_6		x	x	x	x
	Ribosomal protein S24 [Paracentrotus lividus]	TR36703_c0_g1_i1_6		x	x	x	x
		TR42989_c0_g1_i2_3		x	x
		TR28637_c0_g2_i1_6		x	x	x	x
		TR11691_c0_g1_i1_6		x	x	x
	ribosomal protein L17 [Paracentrotus lividus]	TR29079_c0_g1_i1_5		x	x	x	x
		TR49613_c0_g1_i3_3		x	x		x
		TR49613_c0_g1_i2_1		x	x	x
	Septin-2	TR63016_c3_g1_i2_5		x	x	x	x
	Serine-tRNA ligase, cytoplasmic	TR53985_c0_g1_i1_6		x	x	x	x
	Thioredoxin domain-containing protein 5	TR61388_c2_g1_i2_6		x	x	x	x
	Thioredoxin domain-containing protein 5	TR56846_c2_g1_i1_5		x	x	x	x
		TR56846_c2_g1_i4_6		x	x	x	x
	T-complex protein 1 subunit zeta	TR60112_c1_g1_i1_5		x	x	x	x
	T-complex protein 1 subunit gamma	TR46483_c1_g1_i1_4		x	x	x	x
		TR46483_c0_g1_i1_1		x	x	x	x
		TR91038_c0_g1_i1_1		x	x	x	x
	T-complex protein 1 subunit	TR56337_c0_g1_i1_6		x	x	x	x
		TR56337_c0_g1_i2_4		x	x	x	x
	T-complex protein 1 subunit alpha [Strongylocentrotus purpuratus]	TR46990_c1_g1_i1_6		x	x	x
	T-complex protein 1 subunit eta	TR60867_c1_g1_i1_5		x	x	x	x
		TR60867_c1_g1_i2_6		x	x	x	x
		TR60867_c1_g1_i3_6		x	x		x
	40S ribosomal protein	TR36636_c0_g1_i1_4		x	x	x	x
		TR62108_c1_g1_i2_3		x	x	x	x
		TR62108_c1_g1_i3_2		x	x	x	x
	40S ribossomal protein (SP)	TR42910_c0_g1_i1_2		x	x		x
		TR42310_c0_g1_i1_4		x	x	x	x
	40S ribossomal protein S3a	TR49530_c0_g1_i1_6		x	x	x	x
		TR49530_c1_g1_i1_3		x	x	x	x
		TR36283_c0_g1_i1_6		x	x	x	x
		TR3484_c0_g2_i1_6		x			x
	40S ribossomal protein S3	TR26393_c0_g1_i1_5		x	x	x	x
		TR88055_c0_g1_i1_4		x	x	x	x
		TR95481_c0_g1_i1_6		x	x	x	x
	40S ribosomal protein S2	TR30092_c0_g1_i1_5		x	x	x	x
		TR91003_c0_g1_i1_6		x
		TR47981_c0_g2_i2_2		x
		TR77370_c0_g1_i1_4		x	x	x	x
	40S ribossomal protein AS	TR49561_c0_g1_i1_4		x	x	x	x
		TR76555_c0_g1_i1_4		x	x	x	x
		TR56958_c0_g1_i1_1			x	x	x
	40S ribosomal protein S5 [Strongylocentrotus purpuratus]	TR37864_c0_g1_i2_3			x	x	x
		TR66069_c0_g1_i1_5			x	x	x
		TR37864_c0_g1_i1_3			x	x	x
	40S ribosomal protein S18	TR23764_c0_g1_i1_1		x	x	x	x
		TR65233_c0_g1_i1_6		x	x	x	x
		TR98537_c0_g1_i1_4		x	x	x
	40S ribosomal protein S17	TR13025_c0_g1_i1_4		x	x	x
		TR60940_c1_g1_i1_4		x	x
		TR45266_c0_g1_i1_4		x	x	x
	40S ribosomal protein S24 [Strongylocentrotus purpuratus]	TR33981_c0_g1_i1_4		x	x	x	x
	40S ribosomal protein S23 [Strongylocentrotus purpuratus]	TR41433_c0_g1_i1_4		x	x	x	x
		TR45267_c0_g1_i3_2		x		x	x
		TR65010_c0_g1_i1_4		x		x	x
	40S ribosomal protein S4	TR58374_c0_g1_i1_5		x
		TR58374_c1_g1_i4_2		x
		TR91025_c0_g1_i1_5		x
		TR58374_c1_g1_i3_1		x
	60S ribosomal protein L23	TR34177_c0_g2_i1_6		x	x	x	x
		TR102069_c0_g1_i1_4		x	x	x	x
		TR7938_c0_g1_i1_6		x	x	x	x
		TR17873_c0_g1_i1_4		x	x	x	x
	60S ribossomal protein	TR28228_c0_g1_i1_3		x	x	x	x
		TR68106_c0_g1_i1_4			x	x
		TR9469_c0_g1_i1_4		x			x
	60S ribosomal proteinL22 (SP)	TR26892_c0_g1_i1_6		x	x	x	x
		TR45892_c0_g1_i7_2		x	x	x	x
	60S ribosomal protein L36	TR34957_c0_g1_i1_1		x	x	x	x
	60S ribosomal protein L7a	TR52718_c0_g1_i1_5		x	x	x	x
		TR52718_c2_g1_i3_2		x	x
		TR52718_c2_g1_i5_3		x	x	x	x
		TR52718_c2_g1_i4_2		x	x	x	x
		TR52718_c2_g2_i1_1		x	x
	60S acidic ribosomal protein P0	TR45835_c1_g1_i1_4		x	x	x	x
		TR45835_c0_g1_i1_2		x	x	x	x
		TR38075_c0_g1_i1_2		x	x	x	x
		TR47_c0_g1_i1_5			x
	60S acidic ribosomal protein P2-like [Strongylocentrotus purpuratus]	TR55867_c3_g1_i1_2			x
	60S ribosomal protein L5	TR53132_c2_g2_i1_6		x	x	x	x
		TR53132_c3_g1_i2_2		x	x	x	x
	60S ribosomal protein L30 isoform X2 [Strongylocentrotus purpuratus]	TR37441_c0_g1_i2_1		x	x	x	x
	60S ribosomal protein L18 [Strongylocentrotus purpuratus]	TR22501_c0_g1_i1_5		x	x	x	x
	60S ribosomal protein L8 [Strongylocentrotus purpuratus]	TR37184_c0_g1_i1_6		x	x	x	x
	60S ribosomal protein L23a	TR39054_c0_g1_i1_5		x		x	x
		TR12769_c0_g1_i1_5		x	x	x	x
		TR45341_c0_g1_i2_1				x
	60S ribosomal protein L3	TR59721_c0_g1_i1_4		x	x	x	x
		TR59721_c0_g1_i2_4		x	x	x	x
		TR59721_c1_g2_i10_3		x	x	x	x
		TR59721_c1_g1_i1_2		x		x	x
		TR59721_c0_g1_i2_5		x	x	x	x
		TR61716_c4_g1_i10_6		x			x
		TR59721_c1_g2_i6_3		x	x	x	x
		TR79882_c0_g1_i1_4		x	x	x	x
		TR59721_c1_g2_i2_3		x	x	x	x
		TR59721_c1_g2_i12_3		x			x
		TR59721_c1_g2_i5_3					x
	60S ribosomal protein L12 [Strongylocentrotus purpuratus]	TR36669_c0_g1_i1_4		x	x	x	x
		TR52158_c0_g1_i2_1		x	x	x
		TR31500_c0_g1_i1_6		x
		TR99018_c0_g1_i1_6		x		x
	60S ribosomal protein L13	TR44302_c0_g1_i1_4		x	x	x	x
	60S ribossomal protein L24	TR27953_c0_g1_i1_4			x
	Elogation factor 1B beta subunit (SP)	TR54599_c1_g1_i2_6		x	x	x	x
		TR54599_c1_g1_i1_5		x	x	x	x
		TR54599_c1_g1_i1_4		x	x	x	x
	Translation elongation factor 1B gamma subunit [Strongylocentrotus purpuratus]	TR56257_c2_g1_i1_6			x	x	x
		TR56257_c2_g1_i3_4			x
		TR35487_c0_g1_i1_3			x	x	x
		TR23318_c0_g1_i1_3			x	x	x
		TR56257_c0_g1_i1_3			x
	lysine--tRNA ligase isoform X2	TR53004_c0_g1_i1_4			x
Post translations modifications	C-type lectin domain family 17, member A	TR45197_c1_g1_i1_4		x	x	x	x
		TR57048_c0_g1_i4_3		x	x	x	x
		TR45197_c1_g1_i3_5			x		x
		TR57048_c0_g1_i1_3			x		x
	Dolichyl-diphosphooligosaccharide--protein glycosyltransferase subunit 2	TR59463_c0_g1_i2_6		x	x	x	x
		TR76527_c0_g1_i1_3		x	x	x	x
	Dolichyl-diphosphooligosaccharide--protein glycosyltransferase 48 kDa subunit	TR59159_c3_g1_i1_5		x	x	x
		TR59159_c4_g1_i1_1		x	x
	Dolichyl-diphosphooligosaccharide--protein glycosyltransferase subunit STT3B	TR61096_c2_g2_i3_6		x	x	x	x
		TR61096_c2_g2_i4_4		x	x	x	x
		TR62013_c2_g1_i32_1		x		x
		TR62013_c2_g1_i10_2		x	x	x
		TR61096_c0_g2_i1_1			x
		TR62013_c2_g1_i11_1			x
		TR61096_c0_g3_i1_1			x
	glutamyl aminopeptidase-like [Strongylocentrotus purpuratus]	TR25271_c0_g1_i1_6		x	x	x	x
	Low molecular weight phosphotyrosine protein phosphatase	TR47997_c0_g1_i2_4		x	x	x	x
	polypeptide N-acetylgalactosaminyltransferase 13 [Strongylocentrotus purpuratus]	TR60692_c0_g1_i1_4		x	x	x	x
		TR33750_c0_g1_i1_4		x	x		x
		TR63509_c4_g1_i1_6			x
	UDP-glucose:glycoprotein glucosyltransferase	TR63031_c1_g1_i6_6		x	x	x	x
		TR63031_c1_g1_i7_5		x		x	x
		TR63031_c1_g1_i1_6		x	x	x	x
		TR63031_c1_g1_i4_5		x		x	x
		TR63031_c1_g1_i2_6		x		x
	procollagen-lysine,2-oxoglutarate 5-dioxygenase	TR60646_c2_g2_i3_6			x
		TR60646_c2_g2_i4_6			x
	alpha-N-acetylgalactosaminidase isoform X4 [Strongylocentrotus purpuratus]	TR50238_c0_g1_i2_5			x	x
		TR50238_c0_g1_i1_5			x	x
		TR12042_c0_g1_i1_2			x	x
		TR64867_c0_g1_i1_6			x
		TR31957_c0_g2_i1_6			x
	protein DD3-3	TR60684_c2_g1_i1_5			x
		TR75583_c0_g1_i1_3			x
		TR60684_c0_g1_i1_1			x
		TR30748_c0_g1_i1_2			x
	protein farnesyltransferase/geranylgeranyltransferase type-1 subunit alpha [Strongylocentrotus purpuratus]	TR59710_c1_g1_i3_4			x
		TR59710_c1_g1_i1_4			x
Protein sorting and transportation	ABC transporter E family member 1	TR57634_c0_g1_i1_4		x	x	x	x
	Annexin A7	TR62189_c3_g1_i1_5		x	x	x	x
		TR62189_c3_g1_i4_4		x	x	x	x
		TR76685_c0_g1_i1_1		x	x	x	x
	Apolipophorins-like (SP)	TR58099_c0_g1_i3_1		x	x	x
		TR63825_c6_g14_i1_4		x	x	x
		TR58099_c0_g1_i1_1		x	x	x
		TR58099_c0_g1_i2_3		x
		TR58099_c0_g2_i1_2		x	x
		TR58099_c0_g1_i5_1			x
	Clathrin heavy chain 1 isoform X2 (SP)	TR4348_c0_g2_i1_1		x	x
		TR4348_c0_g1_i1_1			x	x
	Coatomer subunit beta	TR61818_c2_g1_i1_6		x	x	x
		TR61818_c1_g1_i1_2		x	x
	Coatomer subunit gamma-2	TR56485_c0_g1_i1_6		x	x	x	x
	Coatomer subunit epsilon	TR54365_c3_g1_i1_4		x	x	x	x
	Dynamin-1-like protein isoform X2 (SP)	TR59846_c0_g1_i2_5		x	x	x	x
	Endoplasmin OS	TR63936_c3_g1_i1_5		x	x	x	x
		TR63936_c3_g1_i2_6		x	x	x	x
		TR38264_c0_g1_i1_3		x	x	x	x
		TR38264_c0_g1_i2_3		x	x	x	x
		TR42002_c0_g1_i1_2		x	x	x	x
		TR63936_c0_g1_i1_2		x	x	x	x
		TR42504_c0_g3_i1_6		x	x	x	x
		TR63936_c6_g1_i1_3		x	x	x	x
	endoplasmic reticulum-Golgi intermediate compartment protein 1 [Strongylocentro	TR41921_c0_g1_i1_6		x	x		x
	protein ERGIC-53-like [Strongylocentrotus purpuratus]	TR61561_c1_g1_i1_6			x	x
	Golgi apparatus protein 1 [Strongylocentrotus purpuratus]	TR62440_c1_g1_i1_6			x
		TR98442_c0_g1_i1_2			x
	Flotillin-1	TR54433_c1_g1_i1_6		x	x	x	x
		TR54433_c0_g1_i1_1		x	x	x	x
		TR93738_c0_g1_i1_2		x		x	x
	Guanine nucleotide-binding protein subunit beta isoform	TR45454_c1_g1_i1_5		x	x	x	x
		TR77701_c0_g1_i1_3		x	x	x	x
		TR15768_c0_g1_i1_3		x	x	x	x
		TR59298_c0_g1_i1_4		x	x	x	x
	Glutamate dehydrogenase	TR56351_c0_g1_i1_5		x	x	x	x
		TR56351_c0_g1_i3_6		x	x	x	x
		TR56351_c0_g1_i2_4		x	x	x	x
		TR34658_c0_g1_i1_4		x	x	x
	Putative vacuolar protein sorting-associated protein 13F	TR8707_c0_g1_i1_5		x	x	x	x
	Ras-related protein Rab-8B	TR62305_c4_g1_i1_6		x	x	x	x
		TR57607_c2_g3_i1_5		x	x	x	x
		TR51350_c6_g10_i1_5		x	x	x	x
		TR62250_c3_g3_i4_6		x	x	x
		TR62482_c0_g1_i1_6		x	x	x	x
		TR44397_c1_g1_i1_4		x	x	x	x
		TR62305_c3_g1_i1_1		x	x	x	x
		TR48210_c1_g1_i1_5		x	x	x	x
		TR62305_c3_g2_i1_3		x	x	x	x
		TR96697_c0_g1_i1_5		x		x	x
		TR20144_c0_g1_i1_4		x	x	x	x
		TR57123_c0_g1_i1_5		x	x	x	x
		TR39477_c0_g1_i1_4			x	x
		TR48210_c1_g1_i3_6			x	x	x
	Ras-related protein Rab-2A	TR62311_c1_g1_i1_6		x	x	x	x
		TR16745_c0_g1_i1_1		x	x	x	x
		TR79099_c0_g1_i1_6		x	x	x	x
		TR61523_c0_g1_i2_3			x
	ras-related protein Rab-5B [Strongylocentrotus purpuratus]	TR63999_c7_g1_i2_6
		TR73107_c0_g1_i1_3
	SEC13	TR53983_c6_g1_i1_4			x	x
	Sorting nexin 2 (SP)	TR62959_c2_g1_i1_5		x	x		x
		TR62959_c1_g1_i1_2		x	x	x	x
		TR62959_c0_g1_i1_1		x	x		x
	translocon-associated protein subunit delta [Strongylocentrotus purpuratus]	TR53229_c1_g1_i1_6		x	x	x	x
		TR12687_c0_g1_i1_3		x	x	x	x
	protein transport protein Sec31A isoform X8 [Strongylocentrotus purpuratus]	TR62163_c3_g1_i2_6		x	x	x	x
		TR62163_c3_g1_i1_6		x	x
	Vacuolar protein sorting-associated protein 35 (SP)	TR60328_c4_g1_i1_5		x	x	x	x
	vacuolar protein sorting-associated protein 13A isoform X7 [Strongylocentrotus purpuratus]	TR101472_c0_g1_i1_4		x	x	x	x
	vacuolar protein sorting-associated protein 13C isoform X2 [Strongylocentrotus purpuratus]	TR89588_c0_g1_i1_6		x		x
	Vacuolar protein sorting-associated protein 26B-A	TR58359_c1_g1_i1_4		x	x	x	x
		TR69270_c0_g1_i1_1		x		x	x
	Vacuolar protein sorting-associated protein	TR62752_c0_g1_i3_4		x	x	x	x
		TR62752_c0_g1_i2_4		x	x	x	x
		TR62752_c0_g1_i1_6		x	x	x	x
	vesicle-associated membrane protein-associated protein A [Strongylocentrotus purpuratus]	TR56080_c9_g1_i1_6		x	x	x	x
Protein degradation	Aminopeptidase N	TR60327_c4_g1_i1_4		x	x	x	x
	Cathepsin	TR53011_c0_g1_i1_5		x	x	x	x
	Cathepsin	TR56182_c0_g1_i2_6		x	x	x
		TR56182_c0_g1_i1_5		x	x	x
		TR56182_c0_g1_i3_5			x	x
	Calpain-9	TR79973_c0_g1_i1_1		x
		TR52968_c3_g1_i1_6		x	x	x	x
		TR28054_c0_g1_i1_2		x	x	x	x
		TR10681_c0_g1_i1_4		x	x		x
		TR19194_c0_g1_i1_4		x	x	x
		TR28054_c0_g2_i1_2		x	x	x	x
	Cathepsin	TR55997_c2_g1_i1_4		x	x	x	x
		TR16985_c0_g1_i1_3		x	x	x	x
		TR3408_c0_g1_i1_1		x	x	x	x
		TR55997_c2_g1_i3_5			x
	cathepsin L1-like [Strongylocentrotus purpuratus]	TR54540_c0_g1_i4_3		x		x
		TR54540_c0_g1_i1_3		x	x	x	x
		TR61675_c10_g1_i1_4		x		x
	E3 ubiquitin-protein ligase TRIM71	TR40565_c1_g1_i1_4		x	x	x	x
	E3 ubiquitin-protein ligase TRIM33	TR54849_c1_g1_i1_6				x	x
	Murinoglobulin	TR63860_c3_g6_i1_6		x	x	x	x
		TR63860_c3_g6_i2_4		x	x	x
		TR67752_c0_g1_i1_1		x	x	x	x
	protein N-terminal glutamine amidohydrolase [Strongylocentrotus purpuratus]	TR54427_c0_g1_i1_5		x	x	x	x
	Proteasome subunit alpha type-4	TR58538_c3_g1_i2_5		x	x	x	x
		TR31801_c0_g1_i1_3		x	x	x	x
	Proteasome subunit alpha type-1	TR50072_c0_g1_i1_4		x	x	x	x
	Proteasome subunit alpha type-5	TR51826_c5_g1_i1_4		x	x	x	x
		TR13412_c0_g1_i1_1		x	x		x
	proteasome 26S subunit 4 ATPase-like (SP)	TR59876_c2_g2_i1_4		x
		TR12890_c0_g1_i1_6		x
	proteasome subunit beta type-3 [Strongylocentrotus purpuratus]	TR51843_c1_g1_i1_5		x	x	x	x
		TR51843_c0_g1_i1_3		x	x		x
	Proteasome subunit beta type-1	TR58451_c2_g1_i1_5		x	x	x	x
		TR71641_c0_g1_i1_4		x	x		x
	proteasome subunit alpha	TR51301_c1_g1_i1_6			x
		TR51301_c0_g1_i1_1			x
	Proteasome subunit beta type-4 (Fragment)	TR48436_c0_g1_i1_5		x	x	x	x
	proteasome subunit alpha type-6 [Strongylocentrotus purpuratus]	TR53306_c0_g1_i1_4			x	x	x
	26S proteasome non-ATPase regulatory subunit 12-like	TR62251_c9_g2_i1_6			x
	proteasome subunit alpha type 2	TR58015_c6_g1_i1_5				x
	prenylcysteine oxidase 1-like [Strongylocentrotus purpuratus]	TR37365_c0_g1_i1_5		x	x	x
	putative N-acetylated-alpha-linked acidic dipeptidase isoform X3 [Strongylocentrotus purpuratus]	TR59482_c1_g1_i1_6		x	x
		TR59482_c1_g1_i2_6		x	x
	Ubiquitin-like modifier-activating proteins	TR62679_c3_g1_i1_4		x	x	x	x
	Ubiquitin-like modifier-activating enzyme 1	TR62029_c0_g1_i4_4		x	x	x	x
	ubiquitin-40S ribosomal protein S27 a (SP)	TR45049_c0_g1_i1_6		x	x		x
		TR20035_c0_g1_i1_6		x	x		x
		TR46377_c2_g1_i1_6		x	x	x	x
		TR46377_c2_g3_i1_6		x	x	x
		TR98544_c0_g1_i1_5		x		x
		TR32769_c0_g1_i1_5		x	x	x	x
		TR26994_c0_g1_i1_6		x		x
	26S protease regulatory subunit 8	TR54320_c1_g1_i1_6		x	x	x	x
		TR33944_c0_g1_i1_6		x
	26S protease regulatory subunit 7	TR57612_c6_g3_i1_4		x	x	x	x
		TR9671_c0_g1_i1_1		x
	26S protease regulatory subunit 10B homolog A	TR50584_c0_g1_i1_6		x	x	x	x
	26S proteasome non-ATPase regulatory subunit 12 [Strongylocentrotus purpuratus]	TR62251_c9_g2_i1_6		x	x	x
	Cathepsin Z [SP]	TR57591_c8_g4_i2_6			x	x
		TR57591_c1_g1_i1_2			x	x
	ubiquilin-1-like [Strongylocentrotus purpuratus]	TR62787_c4_g1_i1_4			x
		TR62787_c4_g1_i4_5			x
Oxidative stress	Dual oxidase 2	TR59853_c8_g1_i2_4		x	x	x	x
		TR59853_c8_g1_i1_6		x	x	x	x
		TR59853_c8_g1_i3_5		x	x	x	x
		TR59853_c8_g1_i3_4		x	x	x	x
		TR59853_c7_g1_i4_2		x	x	x	x
		TR59853_c6_g1_i1_3		x	x	x	x
		TR59853_c0_g1_i1_2		x	x	x	x
		TR59853_c7_g1_i2_2		x	x	x	x
		TR28655_c0_g1_i1_3		x	x	x	x
		TR59828_c0_g1_i1_1		x	x	x	x
		TR59853_c7_g1_i3_2		x			x
		TR40930_c0_g1_i1_4		x	x	x	x
		TR62734_c2_g2_i1_6				x	x
	Heat shock protein HSP 90-alpha	TR54028_c0_g1_i1_5		x	x	x	x
		TR30281_c0_g2_i1_1		x	x	x	x
		TR21141_c0_g1_i1_1		x	x	x	x
		TR62318_c0_g1_i1_6		x	x	x	x
		TR30281_c0_g1_i1_1		x	x	x	x
		TR20869_c0_g1_i1_5		x	x	x	x
		TR80421_c0_g1_i1_1		x	x	x	x
		TR62318_c0_g1_i2_4		x	x	x	x
		TR56917_c0_g2_i2_2		x	x	x	x
		TR6477_c0_g1_i1_4		x
	Heat shock cognate protein	TR61272_c4_g1_i2_4		x	x	x	x
		TR61965_c5_g1_i4_6		x	x	x	x
		TR61965_c5_g1_i7_6		x	x	x	x
		TR61965_c5_g1_i2_6		x	x	x	x
		TR61965_c5_g1_i3_6		x	x	x	x
		TR61965_c1_g1_i1_4		x	x	x	x
		TR61965_c4_g1_i1_1		x	x	x	x
		TR42071_c0_g1_i1_2		x	x	x	x
		TR62582_c0_g1_i1_6		x	x	x	x
		TR58912_c0_g1_i1_4		x	x	x	x
		TR61272_c3_g1_i1_2		x	x	x	x
		TR61272_c2_g1_i1_3		x	x	x	x
		TR57996_c1_g1_i1_6		x	x	x	x
		TR41999_c1_g1_i1_5		x	x	x	x
		TR28933_c0_g1_i1_5		x	x	x	x
		TR61965_c5_g1_i1_5		x	x	x	x
		TR42071_c0_g1_i2_3		x	x	x	x
		TR61272_c5_g1_i1_1		x	x	x	x
		TR79898_c0_g1_i1_4		x	x	x	x
		TR41999_c0_g1_i1_5		x	x	x	x
		TR61965_c4_g1_i3_1		x	x	x	x
		TR56557_c0_g1_i1_4		x	x	x	x
		TR84763_c0_g1_i1_4		x	x	x	x
		TR18025_c0_g1_i1_1		x
		TR61272_c1_g1_i1_2		x	x	x	x
		TR22381_c1_g1_i1_4		x	x	x	x
		TR65094_c0_g1_i1_5		x	x	x	x
		TR80887_c0_g1_i1_4		x	x	x	x
	Heat shock 70 kDa protein 4	TR61029_c2_g1_i1_5		x	x	x	x
	Heat shock cognate protein	TR34148_c0_g1_i1_6		x	x	x	x
		TR63064_c1_g1_i1_5		x		x	x
	hypoxia up-regulated protein 1-like [Strongylocentrotus purpuratus]	TR60845_c2_g1_i2_4		x	x	x	x
		TR60845_c2_g1_i4_6		x	x	x	x
		TR62115_c0_g1_i1_2		x	x	x
		TR21428_c0_g1_i1_1		x	x	x	x
		TR32246_c0_g1_i1_3		x	x	x	x
	Oxidative stress	TR57361_c0_g1_i1_4		x	x	x	x
		TR57361_c0_g1_i2_4		x	x	x	x
	peroxiredoxin-6 isoform X1 [Strongylocentrotus purpuratus]	TR44266_c0_g1_i1_6		x	x	x	x
	Thioredoxin reductase 1	TR56889_c0_g1_i2_4		x	x	x	x
		TR56889_c0_g1_i1_6		x	x	x	x
	Plancitoxin-1	TR49117_c1_g1_i1_6			x	x
	alpha-aminoadipic semialdehyde dehydrogenase [Strongylocentrotus purpuratus]	TR57361_c0_g1_i1_4			x
		TR57361_c0_g1_i3_5			x
Enzymatic activity	Aldehyde dehydrogenase, mitochondrial	TR58589_c3_g2_i3_4		x	x	x	x
		TR58589_c3_g2_i2_5		x	x	x	x
		TR58589_c3_g2_i1_5		x	x	x
		TR50408_c0_g1_i1_6				x
	alpha-aminoadipic semialdehyde synthase, mitochondrial [Strongylocentrotus purpuratus]	TR49483_c2_g2_i2_6		x	x	x	x
	Alpha enolase	TR45866_c0_g1_i1_6		x	x	x	x
		TR64410_c0_g1_i1_4		x	x	x	x
		TR101955_c0_g1_i1_1		x	x	x	x
		TR67462_c0_g1_i1_5			x		x
		TR30118_c0_g1_i1_4			x	x	x
	Arylsulfatase A	TR59558_c1_g1_i1_4		x	x	x
		TR59558_c1_g1_i2_4		x	x	x
		TR88938_c0_g1_i1_1		x		x
		TR22422_c0_g1_i1_3		x	x	x
		TR59558_c0_g1_i1_4			x	x
		TR73906_c0_g1_i1_2			x	x
		TR67572_c0_g1_i1_1			x
	Aminopeptidase	TR58478_c0_g1_i2_4		x	x	x	x
		TR58478_c0_g1_i1_6		x	x	x	x
	Argininosuccinate synthase	TR60512_c2_g4_i1_5		x	x	x	x
	Arylsulfatase E	TR42015_c0_g1_i1_4		x	x	x	x
	arylsulfatase J-like	TR55885_c3_g1_i1_5		x	x
		TR55885_c3_g1_i2_5		x	x
	Asparagine-tRNA ligase	TR58334_c1_g1_i1_6		x	x	x	x
		TR75799_c0_g1_i1_2		x	x	x
	Catalase	TR57235_c0_g1_i1_5		x	x	x	x
		TR91572_c0_g1_i1_1		x	x	x	x
		TR25072_c0_g1_i1_2		x	x
	Creatine kinase	TR50995_c1_g1_i1_5		x	x	x	x
		TR93847_c0_g1_i1_2		x	x	x	x
	Creatine kinase	TR62103_c2_g1_i1_6		x	x	x	x
	creatine kinase, flagellar	TR62103_c2_g1_i2_5			x	x	x
	protein kinase C [Lytechinus pictus]	TR54906_c0_g1_i2_6			x
	UMP-CMP kinase [SP]	TR60380_c3_g1_i1_5			x
	Cytochrome c oxidase subunit 5A	TR44995_c3_g1_i1_6		x	x	x
		TR75857_c0_g1_i1_2		x	x	x
	dihydropteridine reductase-like [Strongylocentrotus purpuratus]	TR60079_c0_g1_i3_5		x	x	x	x
		TR60079_c0_g1_i1_4		x	x
	Dolichyl-diphosphooligosaccharide--protein glycosyltransferase subunit 1	TR59788_c2_g1_i1_6		x	x	x	x
		TR96999_c0_g1_i1_2		x	x		x
	Electron transfer flavoprotein subunit beta	TR40573_c0_g1_i1_6		x	x	x
	Glutamine synthetase	TR61255_c3_g1_i1_4		x	x	x	x
		TR61255_c2_g1_i2_3		x	x	x	x
		TR61255_c2_g1_i1_3		x	x	x	x
		TR46780_c0_g1_i1_2		x	x	x	x
		TR46780_c0_g1_i2_2		x	x
	Glycerol kinase (SP)	TR60952_c1_g1_i10_6		x	x	x
		TR60952_c1_g1_i2_4		x	x	x
		TR60952_c1_g1_i2_5		x	x	x
	Isocitrate dehydrogenase	TR60655_c0_g1_i1_4		x	x	x	x
	Malate dehydrogenase	TR55726_c2_g1_i1_4		x	x	x	x
	nucleoside diphosphate kinase B [Strongylocentrotus purpuratus]	TR48073_c1_g1_i1_5		x	x
		TR35590_c0_g2_i1_3		x	x	x	x
		TR35590_c0_g1_i1_3		x
		TR83387_c0_g1_i1_6		x	x
	Ornithine aminotransferase, mitochondrial	TR51196_c0_g1_i1_5		x	x	x	x
	Peroxiredoxin-4	TR56259_c4_g1_i1_4		x	x	x	x
	Phosphatidylinositol transfer protein alpha isoform (SP)	TR52935_c5_g1_i2_4		x	x	x	x
	Prolyl 4-hydroxylase subunit alpha-1	TR57901_c3_g2_i4_6		x	x	x	x
		TR57901_c3_g2_i2_4		x	x	x
		TR57901_c3_g2_i4_4		x	x	x
		TR21075_c0_g2_i1_1		x	x	x	x
	Prostaglandin reductase 1	TR43241_c0_g1_i1_5		x	x	x	x
		TR43241_c0_g2_i1_5		x	x	x	x
	Protein disulfide-isomerase 2	TR53657_c3_g1_i1_5		x	x	x	x
	protein henna isoform X1 [Strongylocentrotus purpuratus]	TR53586_c5_g1_i1_5		x	x
		TR53586_c5_g1_i2_4		x	x
	probable isocitrate dehydrogenase [NAD] subunit alpha, mitochondrial [Strongylocentrotus purpuratus]	TR60163_c0_g1_i1_5		x	x	x	x
	retinol dehydrogenase 12 [Strongylocentrotus purpur	TR60962_c0_g4_i2_5		x	x
		TR60962_c0_g4_i3_5		x			x
	Serine hydroxymethyltransferase	TR62369_c1_g1_i3_6			x
		TR62369_c1_g1_i10_4		x	x	x	x
	Tolloid-like protein 1	TR48685_c0_g1_i1_4		x	x	x	x
		TR45890_c0_g1_i1_1		x	x	x	x
		TR29764_c0_g2_i1_2		x	x	x	x
		TR29764_c0_g1_i1_3		x	x	x
		TR18975_c0_g1_i1_3		x	x	x	x
	Tripeptidyl-peptidase 2	TR97928_c0_g1_i1_5		x	x	x	x
	Thyrotropin-releasing hormone-degrading ectoenzyme	TR20387_c0_g2_i1_6		x	x	x	x
		TR20387_c0_g1_i1_6		x	x	x	x
		TR20387_c0_g1_i1_4		x
	Urocanate hydratase	TR58304_c0_g1_i2_6		x	x	x
		TR58304_c0_g1_i1_5		x	x	x
	V-type proton ATPase catalytic subunit A	TR61973_c0_g1_i1_6		x	x	x	x
	V-type proton ATPase subunit B	TR60935_c5_g1_i1_5		x	x	x	x
		TR71850_c0_g1_i1_6		x	x	x	x
	V-type proton ATPase subunit	TR51690_c1_g1_i1_6
	ATP-dependent (S)-NAD(P)H-hydrate dehydratase	TR62247_c3_g1_i1_6			x
	deoxyribose-phosphate aldolase	TR58125_c4_g1_i1_6			x
	iduronate 2-sulfatase	TR47007_c0_g1_i1_6			x	x
		TR50600_c0_g2_i1_4			x	x
	dipeptidyl peptidase 1 [Strongylocentrotus purpuratus]	TR34755_c0_g1_i1_4			x
	serine carboxypeptidase [SP]	TR54423_c0_g1_i1_5			x
		TR54423_c0_g2_i1_6			x
	arylsulfatase B [Strongylocentrotus purpuratus]	TR61520_c3_g1_i1_5			x
		TR61520_c3_g1_i2_5			x
		TR61520_c3_g1_i4_5			x
	Arylsulfatase	TR59825_c1_g1_i1_6			x
		TR58383_c5_g2_i1_4			x
		TR58383_c5_g2_i5_4			x
		TR31829_c0_g1_i1_6			x
	Putative serine protease	TR62502_c2_g1_i1_5			x	x
		TR7034_c0_g1_i1_1			x	x
	endothelin-converting enzyme	TR61462_c4_g1_i1_5			x
	furin	TR41409_c0_g1_i1_4			x
	Phospholipase D3	TR61784_c0_g1_i16_5			x
		TR61784_c0_g1_i12_4			x
	glycerol-3-phosphate dehydrogenase	TR42148_c0_g1_i1_4			x
	beta-hexosaminidase subunit alpha isoform X2 [Strongylocentrotus purpuratus]	TR56388_c1_g1_i1_4			x
		TR56388_c0_g1_i1_3			x
		TR56388_c1_g1_i2_4			x
		TR56388_c1_g1_i3_6			x
		TR56388_c2_g1_i1_2			x
	protein SpAN	TR48571_c0_g1_i2_6			x	x
	propionyl-CoA carboxylase alpha chain, mitochondrial isoform X1 [Strongylocentrotus purpuratus]	TR61266_c0_g1_i13_4			x
	protein mono-ADP-ribosyltransferase PARP3	TR62810_c5_g2_i2_6			x
		TR62810_c5_g2_i10_5			x
		TR69613_c0_g1_i1_3			x
	lysosomal acid glucosylceramidase	TR63596_c2_g6_i2_6			x
		TR63596_c2_g6_i1_4			x
	lysosomal alpha-mannosidase isoform X2 [Strongylocentrotus purpuratus]	TR60128_c0_g1_i1_5			x
	peptidyl-prolyl cis-trans isomerase B	TR63746_c4_g6_i2_6			x	x	x
		TR63746_c4_g6_i2_6			x
		TR63746_c4_g6_i2_6			x
	alpha-N-acetylgalactosaminidase [Strongylocentrotus purpuratus]	TR40700_c1_g1_i1_4			x
	prostatic acid phosphatase [Strongylocentrotus purpuratus]	TR55148_c2_g2_i1_6			x
	glutathione hydrolase 1 proenzyme	TR52209_c5_g1_i1_5			x
	sialidase-1-like	TR49752_c0_g1_i1_4			x
	GTPase HRas [Strongylocentrotus purpuratus]	TR60273_c1_g1_i1_5			x
	sialate O-acetylesterase	TR53025_c1_g2_i1_5			x
Metabolism	Acetyl-coenzyme A synthetase	TR59639_c3_g2_i4_5		x	x	x	x
		TR59639_c3_g2_i3_5		x	x	x	x
		TR59639_c3_g2_i5_4		x	x	x	x
		TR59639_c3_g2_i3_4		x	x	x	x
	Aconitate hydratase	TR62640_c4_g1_i1_6		x	x	x
		TR62640_c4_g1_i4_4		x		x
		TR102211_c0_g1_i1_3		x	x	x
	acyl-CoA dehydrogenase family member 11 [Strongylocentrotus purpuratus]	TR60887_c6_g1_i2_5		x	x	x
	Adenosylhomocysteinase	TR53967_c2_g1_i1_4		x	x	x	x
		TR65539_c0_g1_i1_3		x	x	x	x
		TR99057_c0_g1_i1_6		x	x		x
		TR72085_c0_g1_i1_4		x	x	x	x
	ADP/ATP translocase 1	TR50464_c1_g1_i1_5		x	x	x	x
		TR741_c0_g1_i1_2		x	x	x	x
		TR9906_c0_g1_i1_2		x	x	x	x
		TR48507_c1_g1_i1_6		x	x	x	x
	ADP-ribosylation factor 6	TR56742_c0_g1_i1_5		x	x	x	x
		TR81457_c0_g1_i1_1		x	x	x	x
		TR26734_c0_g1_i1_6			x		x
	alanine aminotransferase 1 [Strongylocentrotus purpuratus]	TR48892_c0_g1_i1_5		x	x	x
	ATP-citrate synthase	TR55635_c0_g1_i1_4		x	x	x	x
	Asparagine synthetase [glutamine-hydrolyzing]	TR57148_c2_g1_i1_5		x	x	x	x
	Aspartate aminotransferase, mitochondrial	TR52873_c2_g1_i3_6		x	x	x
	acyl-coenzyme A thioesterase 9, mitochondrial [Strongylocentrotus purpuratus]	TR48628_c1_g2_i1_6		x	x	x	x
	ATP synthase subunit beta	TR58074_c5_g1_i1_5		x	x	x	x
		TR27779_c0_g1_i1_4		x	x	x	x
		TR58074_c1_g1_i1_3		x	x	x	x
		TR24876_c0_g1_i1_2		x	x	x	x
		TR58074_c3_g1_i1_2		x	x	x	x
		TR64268_c0_g1_i1_4		x	x	x	x
	ATP synthase subunit alpha	TR33231_c0_g1_i1_4		x	x	x	x
		TR25568_c0_g1_i1_3		x	x	x	x
		TR6402_c0_g1_i1_5		x	x	x	x
		TR77129_c0_g1_i1_1		x	x	x	x
		TR79303_c0_g1_i1_6		x	x	x	x
	Beta-ureidopropionase	TR60853_c3_g2_i11_4		x	x	x
	bifunctional 3'-phosphoadenosine 5'-phosphosulfate synthase isoform X1	TR61952_c2_g1_i1_5		x	x	x	x
	bifunctional purine biosynthesis protein PURH	TR55345_c0_g1_i2_4		x	x	x	x
		TR55345_c0_g1_i3_4		x
	carbonyl reductase [NADPH] 1 [Strongylocentrotus purpuratus]	TR53688_c2_g1_i1_6		x
		TR50893_c5_g5_i1_6		x	x		x
		TR50893_c5_g5_i3_5		x		x
		TR50893_c5_g5_i5_5		x		x
		TR50893_c5_g5_i6_4		x			x
		TR50893_c5_g5_i2_6		x
		TR68043_c0_g1_i1_3		x
	Coatomer subunit beta	TR60604_c3_g1_i1_4		x	x	x	x
	Cytosolic 10-formyltetrahydrofolate dehydrogenase	TR63476_c0_g1_i2_5		x	x	x	x
		TR63476_c0_g1_i3_5		x	x	x	x
		TR63476_c0_g1_i1_5		x	x	x	x
	Cytochrome b-c1	TR54226_c0_g1_i1_6		x	x	x	x
		TR65028_c0_g1_i1_3		x	x	x	x
		TR54226_c1_g1_i1_2		x	x
	Dihydropyrimidinase-related protein 3	TR63734_c0_g1_i2_5		x	x	x	x
		TR63734_c0_g1_i1_5		x	x	x	x
		TR64286_c0_g1_i1_2		x	x	x	x
		TR93138_c0_g1_i1_3		x	x	x	x
		TR63734_c0_g1_i5_4			x
	Fatty acid oxidation complex subunit alpha	TR58114_c0_g1_i1_5		x	x	x	x
		TR93385_c0_g1_i1_1		x	x	x	x
		TR58114_c1_g1_i1_2		x	x	x	x
	Fumarylacetoacetase	TR59622_c0_g1_i1_6		x	x	x	x
	Fructose-biphosphate aldolase	TR62154_c5_g1_i2_4		x	x	x	x
		TR85772_c0_g1_i1_2		x	x	x	x
		TR62154_c1_g1_i1_2		x	x	x	x
	Fructose-1,6-biphosphatase 1	TR54557_c2_g1_i1_6		x	x	x	x
		TR59681_c6_g1_i1_4		x	x	x
	Fructose-biphosphate aldolase	TR62154_c5_g1_i1_6			x
	GDP-mannose 4,6 dehydratase 1	TR59734_c7_g1_i1_6		x	x	x	x
		TR59734_c7_g1_i2_6		x	x	x	x
	Cation-independent mannose-6-phosphate receptor	TR62128_c3_g1_i1_5			x
	Glucose-6-phosphate 1-dehydrogenase	TR57401_c0_g1_i3_5		x	x	x	x
		TR57401_c0_g1_i2_5		x	x
		TR57401_c1_g1_i1_3		x	x	x	x
		TR57401_c0_g1_i1_4		x	x	x	x
		TR60710_c0_g3_i1_5		x
	Glucose-6-phosphate isomerase	TR59567_c0_g1_i1_5		x	x	x	x
	Glucosidase 2 subunit beta	TR61541_c1_g2_i1_6		x	x	x	x
		TR61541_c1_g2_i2_4		x	x	x	x
		TR61541_c1_g2_i3_5		x	x	x
	glutamine--fructose-6-phosphate aminotransferase [isomerizing] 2 isoform X2 [Strongylocentrotus purpuratus]	TR62421_c0_g1_i4_5		x			x
		TR62421_c0_g1_i2_5		x
	Glyceraldehyde-3-phosphate dehydrogenase	TR57975_c3_g2_i1_5		x	x	x	x
		TR14942_c0_g1_i1_2		x	x	x	x
		TR96568_c0_g1_i1_4		x	x	x	x
	Glycogen phosphorylase, muscle form	TR63542_c0_g1_i1_4		x	x	x	x
		TR56492_c1_g4_i1_5		x
	Glyxoylate reductase	TR56406_c2_g2_i1_4		x	x	x	x
	Hephaestin	TR45518_c0_g1_i1_4		x	x	x	x
	Hexokinase-1	TR63019_c6_g1_i1_5		x	x	x	x
		TR63019_c6_g1_i2_4		x	x	x	x
	hydroxysteroid dehydrogenase-like protein 2 [Strongylocentrotus purpuratus]	TR51402_c0_g2_i1_5		x	x	x	x
	hypoxanthine-guanine phosphoribosyltransferase isoform X1 [Strongylocentrotus purpuratus]	TR51099_c7_g1_i1_4		x	x	x	x
	isocitrate dehydrogenase [NADP] cytoplasmic isoform X1 [Strongylocentrotus purpuratus]	TR53257_c0_g1_i1_6		x	x	x	x
	Kynurenine--oxoglutarate transaminase 3	TR62954_c0_g6_i1_4		x	x	x	x
	Laccase	TR61822_c3_g1_i3_6		x	x	x	x
		TR61822_c3_g1_i2_6		x	x	x	x
		TR61822_c1_g1_i1_4		x	x	x	x
		TR61822_c3_g1_i4_4		x	x	x
		TR61822_c3_g1_i7_6		x	x	x	x
		TR61822_c0_g1_i1_1		x	x	x	x
		TR51741_c1_g1_i1_1		x	x	x
		TR61822_c3_g1_i1_5				x
		TR61822_c3_g1_i4_6				x
		TR61822_c3_g1_i1_6		x	x	x	x
		TR61822_c0_g2_i1_2			x
		TR61822_c3_g1_i1_5			x
		TR51741_c1_g3_i1_2			x		x
		TR61822_c3_g1_i5_6			x
		TR51741_c1_g2_i1_1			x	x	x
	Laccase-1-like [SP]	TR64232_c24_g1_i1_6			x
		TR71747_c0_g1_i1_5			x
	Laccase-1 [SP]	TR83527_c0_g1_i1_5			x
	Long-chain specific acyl-CoA dehydrogenase, mitochondrial	TR59801_c1_g1_i10_5		x	x	x	x
		TR48120_c0_g1_i1_5		x	x	x
	long-chain-fatty-acid--CoA ligase ACSBG2 isoform X2 [Strongylocentrotus purpuratus]	TR62066_c0_g2_i2_6		x			x
		TR36135_c0_g1_i1_2		x	x		x
		TR9816_c0_g1_i1_5		x	x
	L-xylulose reductase	TR59011_c0_g2_i3_4		x	x	x	x
		TR59011_c0_g2_i5_4		x	x	x	x
		TR59011_c0_g2_i1_6		x	x	x	x
	malate dehydrogenase, cytoplasmic [Strongylocentrotus purpuratus]	TR57800_c0_g1_i1_5		x	x	x	x
		TR57800_c1_g1_i1_3		x	x	x	x
	Maltase	TR46880_c0_g1_i1_6		x	x	x	x
		TR27544_c0_g1_i1_2		x	x	x	x
		TR33524_c0_g1_i2_1		x	x	x
		TR33524_c0_g1_i1_1		x	x	x	x
		TR33354_c0_g2_i1_3		x	x	x	x
		TR2434_c0_g1_i1_6		x	x	x	x
		TR21691_c0_g1_i1_4			x	x	x
		TR33354_c0_g1_i1_3			x
	Multifunctional protein ADE2	TR59426_c4_g1_i1_4		x	x	x	x
		TR8431_c0_g1_i1_2		x	x	x	x
		TR97093_c0_g1_i1_2		x	x	x	x
		TR59426_c0_g1_i1_3		x	x	x
		TR59426_c0_g2_i1_2					x
	NADH-cytochrome b5 reductase 3 (Fragment)	TR59626_c6_g1_i2_5		x	x	x	x
		TR2415_c0_g1_i1_2		x	x	x	x
	NADH dehydrogenase [ubiquinone] 1 beta subcomplex subunit 10 [Strongylocentrotus purpuratus]	TR56500_c1_g3_i1_4		x	x
	NADH dehydrogenase [ubiquinone] iron-sulfur protein 3, mitochondrial [Strongylocentrotus purpuratus]	TR51455_c0_g1_i1_5		x	x	x	x
	obg-like ATPase 1 [Strongylocentrotus purpuratus]	TR58469_c1_g1_i4_4		x	x	x
		TR58469_c1_g1_i1_5		x	x	x	x
		TR58469_c1_g1_i1_6		x	x	x
	peroxidasin	TR60635_c7_g1_i3_5		x	x	x	x
		TR12614_c0_g1_i1_1		x	x	x	x
		TR60635_c7_g1_i1_4		x	x	x	x
		TR18659_c0_g1_i1_2		x	x	x	x
		TR60635_c6_g1_i4_1		x	x	x	x
		TR18659_c0_g1_i1_1		x	x	x	x
		TR30427_c0_g1_i1_4		x	x	x	x
		TR59735_c2_g1_i1_4		x
		TR60635_c7_g1_i2_5			x	x	x
		TR60635_c0_g1_i1_3			x	x	x
		TR60635_c6_g1_i1_1			x	x
	Phosphoacetylglucosamine mutase	TR62372_c0_g1_i2_4		x	x	x	x
	Phosphoglycerate kinase 1	TR52328_c0_g1_i1_4		x	x	x	x
		TR52328_c0_g1_i2_4		x	x	x	x
	Phosphoenolpyruvate carboxykinase, cytosolic (GTP) isoform X2 (SP)	TR62950_c1_g1_i1_4		x	x	x	x
		TR62950_c3_g1_i1_3		x		x	x
	Probable transaldolase	TR51162_c2_g2_i1_6		x	x	x	x
		TR51162_c1_g1_i1_1		x	x	x
	Probable aspartyl aminopeptidase	TR56537_c7_g1_i1_5		x	x	x
	Probable methylmalonate-semialdehyde dehydrogenase	TR59580_c1_g1_i1_4		x	x	x	x
	prolyl 4-hydroxylase subunit alpha-1 [Strongylocentrotus purpuratus]	TR56551_c0_g1_i1_5		x	x	x
		TR31884_c1_g1_i1_4		x	x	x	x
	Pseudaminic acid synthase	TR52397_c3_g1_i1_6		x	x	x	x
	Putative NADPH-dependent methylglyoxal reductase GRP2	TR62270_c4_g1_i1_4		x	x	x	x
	putative ferric-chelate reductase 1 isoform X1 [Strongylocentrotus purpuratus]	TR64001_c8_g2_i2_4		x	x	x	x
		TR64001_c8_g2_i4_4			x
		TR64001_c8_g3_i1_5			x
	Pyrroline-5-carboxylate reductase 3	TR50060_c0_g1_i2_4		x	x	x	x
		TR50060_c0_g1_i1_4		x	x	x
	Pyruvate dehydrogenase	TR61546_c1_g1_i1_6		x	x	x	x
		TR61546_c1_g1_i2_5			x
	Pyruvate kynase	TR59007_c1_g1_i1_5		x	x	x	x
	Short-chain specific acyl-CoA dehydrogenase, mitochondrial	TR42502_c1_g2_i1_4		x	x	x
	Succinyl-CoA:3-ketoacid coenzyme A	TR59928_c1_g1_i2_4		x	x	x	x
		TR10118_c0_g1_i1_4		x	x	x
		TR49773_c0_g1_i2_6		x	x
	sulfide:quinone oxidoreductase, mitochondrial-like isoform X1 [Strongylocentrotus purpuratus]	TR51498_c11_g1_i1_4		x	x	x
	oxidoreductase	TR59561_c3_g1_i4_6			x
	sulfite oxidase [Strongylocentrotus purpuratus]	TR48965_c1_g1_i1_5		x	x	x	x
		TR48965_c1_g1_i3_6		x	x
	Transketolase	TR59594_c5_g1_i1_6		x	x	x	x
		TR59594_c5_g1_i6_6		x	x	x
		TR59594_c5_g1_i3_6		x	x	x	x
		TR20323_c0_g1_i1_3		x	x	x	x
		TR101708_c0_g1_i1_2		x	x	x	x
		TR20323_c0_g1_i2_1			x	x
	triosephosphate isomerase [Strongylocentrotus purpuratus]	TR51284_c0_g1_i1_5		x	x	x	x
	Vigilin	TR63048_c2_g1_i1_6		x	x	x	x
		TR5050_c0_g1_i1_3		x
		TR63048_c0_g1_i1_2		x
		TR86462_c0_g1_i1_1		x		x	x
		TR82427_c0_g1_i1_3				x
		TR1113_c0_g1_i1_3			x	x	x
	6-phosphogluconate dehydrogenase, decarboxylating	TR61335_c1_g1_i1_6		x	x	x	x
		TR28048_c0_g1_i1_3		x	x	x	x
		TR9744_c0_g1_i1_1		x	x	x	x
		TR27242_c0_g1_i1_1		x	x		x
	4-trimethylaminobutyraldehyde dehydrogenase [Strongylocentrotus purpuratus]	TR51930_c0_g2_i1_5		x	x	x
	4-hydroxyphenylpyruvate dioxygenase	TR58940_c0_g1_i1_4		x	x	x	x
	3-ketoacyl-CoA thiolase, mitochondrial [Strongylocentrotus purpuratus]	TR53466_c1_g1_i2_5		x	x	x
	2-amino-3-ketobutyrate coenzyme A ligase, mitochondrial isoform X1 [Strongylocentrotus purpuratus]	TR50475_c0_g1_i1_4		x		x
	15-hydroxyprostaglandin dehydrogenase [NAD(+)] isoform X1 [Strongylocentrotus purpuratus]	TR44377_c0_g1_i1_4		x	x
		TR62219_c0_g1_i1_6		x		x
	ornithine carbamoyltransferase	TR53213_c0_g1_i1_5			x	x	x
	pyruvate dehydrogenase	TR34617_c0_g1_i1_4			x
	ADP-ribosyl cyclase isoform X1	TR47225_c0_g1_i1_4			x
		TR70248_c0_g1_i1_1			x
		TR67475_c0_g1_i1_4			x
		TR66767_c0_g1_i1_1			x
	GMP reductase 1	TR56760_c0_g1_i3_6			x
	bi functional biosynthesis protein	TR55345_c0_g1_i2_4			x
		TR58200_c7_g2_i2_6			x	x
	persulfide dioxygenase [Lytechinus variegatus]	TR58289_c0_g2_i1_6			x
	cytrate synthase SP	TR57816_c1_g1_i2_5			x
	protein O-glucosyltransferase 2 [Strongylocentrotus purpuratus]	TR14452_c0_g2_i1_5			x
		TR14452_c0_g1_i1_5			x
	hydroxyacid oxidase	TR44625_c1_g1_i1_4			x
	3-hydroxyanthranilate 3,4-dioxygenase	TR44231_c0_g1_i1_5			x	x	x
	prostanglandin reductase	TR53014_c3_g1_i1_4			x
	formimidoyltransferase-cyclodeaminase [Strongylocentrotus purpuratus]	TR62087_c0_g1_i2_5			x
Immune system	Complement C1q-like protein	TR49038_c1_g1_i1_5		x	x	x	x
	complement C2-like [Strongylocentrotus purpuratus]	TR62982_c5_g2_i5_6		x	x	x	x
	Complement control protein C3	TR31736_c0_g1_i1_2		x	x	x	x
		TR31736_c0_g1_i3_3		x	x	x	x
		TR31736_c0_g1_i2_2		x	x	x	x
	C4b-binding protein alpha chain	TR29246_c0_g1_i1_5		x	x	x	x
		TR29246_c0_g1_i3_5		x	x	x	x
		TR51603_c0_g2_i1_1		x	x	x	x
		TR29246_c0_g1_i2_6		x	x	x	x
		TR51603_c0_g1_i2_3		x	x	x	x
		TR51603_c0_g2_i2_1		x
	erythrocyte band 7 integral membrane protein-like [Strongylocentrotus purpuratus]	TR62380_c3_g4_i1_4		x	x	x	x
		TR62552_c2_g1_i1_6		x	x	x
		TR62552_c2_g1_i2_6		x		x
		TR62380_c3_g4_i4_6			x
	ER membrane protein complex	TR62787_c4_g2_i1_5			x
		TR62787_c4_g2_i2_5			x
	Leukocyte elastase inhibitor A	TR40914_c0_g1_i1_6		x	x	x
	L-rhamnose-binding lectin CSL2	TR52701_c2_g1_i1_5		x	x	x	x
		TR52701_c2_g1_i2_4		x	x	x	x
		TR52701_c0_g1_i1_1		x	x	x	x
	Major vault protein	TR62572_c4_g1_i1_4		x	x	x	x
		TR62572_c4_g1_i2_5		x	x	x	x
		TR62572_c2_g1_i2_2		x	x	x	x
		TR62572_c3_g1_i1_2		x	x	x	x
		TR62572_c5_g1_i1_1		x	x	x	x
		TR62572_c3_g1_i2_2		x	x	x	x
		TR62572_c2_g1_i1_3		x		x	x
		TR62572_c2_g1_i3_3				x	x
		TR28142_c0_g2_i1_5					x
	Ras-related C3 botulinum toxin substrate 1	TR54222_c0_g1_i2_6		x	x	x	x
	Scavenger receptor cystein-rich protein (SP)	TR58079_c1_g2_i1_5		x	x	x	x
		TR58079_c0_g1_i1_2		x	x	x	x
		TR58079_c1_g6_i1_4		x	x
		TR21187_c0_g1_i1_4		x	x		x
	Scavenger receptor cystein-rich protein (SP)	TR63752_c11_g1_i1_5			x
		TR63752_c11_g1_i2_6			x
	Scavenger receptor cysteine-rich type 1	TR61396_c1_g1_i1_5		x	x	x	x
		TR61396_c1_g1_i2_5		x	x	x
	Scavenger receptor cysteine-rich type 1	TR54498_c5_g3_i1_6		x	x	x	x
	Scavenger receptor cysteine-rich type 1	TR59516_c11_g2_i1_6		x	x	x	x
		TR59516_c11_g2_i2_6		x	x	x	x
	Scavenger receptor cysteine-rich protein (SP)	TR59130_c4_g2_i2_6		x	x	x	x
		TR59130_c4_g2_i1_4		x	x	x	x
	scavenger receptor cysteine-rich domain superfamily protein isoform X3 [Strongylocentrotus purpuratus]	TR42638_c0_g1_i1_4			x
		TR14398_c0_g1_i1_6			x
	strongylocin-2b [Strongylocentrotus droebachiensis]	TR37169_c0_g1_i1_6		x	x	x	x
		TR37169_c0_g2_i1_6		x	x	x	x
	T-complex protein 1 subunit delta [Strongylocentrotus purpuratus]	TR55939_c8_g13_i1_5		x	x	x	x
	T-complex protein 1 subunit epsilon [Strongylocentrotus purpuratus]	TR60084_c0_g1_i1_6		x	x	x	x
		TR69512_c0_g1_i1_3		x
	T-complex protein 1 subunit theta [Strongylocentrotus purpuratus]	TR58271_c0_g1_i2_6				x	x
		TR58271_c0_g1_i1_4			x	x	x
	Venom factor	TR64011_c7_g3_i5_6		x	x	x	x
		TR64011_c7_g3_i1_6		x	x	x	x
		TR64011_c2_g1_i1_3		x	x
		TR91485_c0_g1_i1_3		x	x	x	x
		TR64011_c6_g1_i1_3		x	x	x	x
		TR9508_c0_g1_i1_3		x	x	x	x
		TR64011_c7_g3_i8_6			x
	Venom phosphodiesterase	TR62137_c1_g1_i2_5			x
		TR62137_c1_g1_i1_5			x
	anoctamin-4-like	TR63799_c1_g1_i1_5			x
	bactericidal permeability-increasing protein [Strongylocentrotus purpuratus]	TR55179_c0_g1_i1_4			x
Uncharacterized Proteins	LOC105438612 [SP]	TR58775_c0_g1_i2_6		x	x	x	x
		TR58775_c0_g1_i5_6		x	x	x	x
		TR58775_c0_g1_i3_6		x	x	x	x
		TR58775_c0_g1_i4_4		x	x	x	x
		TR58775_c0_g1_i1_4		x	x	x	x
		TR42416_c0_g1_i2_2		x	x	x	x
		TR31527_c0_g2_i1_2		x	x		x
		TR55053_c5_g1_i1_5		x	x	x	x
	LOC105437357 (SP)	TR63966_c16_g2_i1_6		x	x	x	x
		TR63966_c16_g2_i2_6		x	x	x	x
		TR63966_c16_g2_i3_4		x	x	x	x
		TR91338_c0_g1_i1_2		x	x
		TR68840_c0_g1_i1_3		x			x
	LOC578616 isoform X3 (SP)	TR59419_c4_g1_i1_5		x	x	x	x
		TR101635_c0_g1_i1_1		x	x	x	x
		TR59419_c3_g1_i2_3		x	x	x	x
		TR59419_c3_g1_i1_3		x	x	x	x
	LOC115927989 (SP)	TR47696_c1_g1_i1_2		x	x	x	x
		TR38920_c0_g1_i1_4		x	x	x	x
	LOC582310 (SP)	TR60840_c3_g1_i5_5		x	x	x	x
		TR60840_c3_g1_i1_5		x	x	x	x
		TR60840_c3_g1_i2_5		x	x	x	x
		TR44569_c0_g1_i1_3		x	x	x	x
		TR92099_c0_g1_i1_3		x	x	x	x
		TR44777_c0_g1_i1_3		x	x	x	x
		TR347_c0_g1_i1_1		x	x		x
		TR44569_c1_g2_i1_2		x	x	x	x
		TR44777_c1_g1_i2_3		x	x	x	x
		TR44569_c1_g2_i2_2			x	x	x
		TR36387_c0_g1_i1_2				x
	LOC100888136 (SP)	TR62996_c0_g1_i1_4		x	x	x
	YMR196W (SP)	TR57183_c0_g1_i1_6		x	x	x	x
	LOC755972 (SP)	TR54244_c6_g1_i1_5		x	x	x
		TR54244_c6_g1_i2_4		x	x	x
	LOC105443737 (SP)	TR59684_c2_g1_i1_5		x	x	x	x
		TR59684_c2_g1_i3_4		x	x	x
	LOC115927989 (SP)	TR12685_c0_g1_i1_6		x	x	x	x
		TR58202_c1_g1_i3_2			x	x	x
		TR60765_c2_g1_i1_2			x	x	x
	LOC752525 (SP)	TR54666_c9_g1_i1_5		x	x	x	x
	LOC115927989 (SP)	TR43195_c0_g1_i1_2		x	x	x	x
		TR45303_c1_g1_i1_5		x	x	x	x
		TR43195_c0_g1_i1_3		x	x	x	x
	LOC105446501 (SP)	TR58793_c8_g4_i2_6		x	x	x	x
	LOC578616 isoform X3 (SP)	TR59419_c2_g1_i1_3		x	x
	P19A11.02c (SP)	TR52960_c3_g1_i4_4		x	x	x	x
	LOC115928612 [Strongylocentrotus purpuratus]	TR61808_c3_g4_i1_4		x	x	x	x
	LOC115923299 [Strongylocentrotus purpuratus]	TR61580_c9_g1_i1_6		x	x	x	x
		TR18879_c0_g1_i1_2		x	x	x	x
		TR32478_c0_g1_i1_1		x		x	x
		TR36053_c0_g1_i1_2		x	x	x	x
	B0303.3 isoform X1 [Strongylocentrotus purpuratus]	TR50771_c1_g1_i1_6		x	x	x	x
		TR67057_c0_g1_i1_2		x		x	x
	LOC583017 [Strongylocentrotus purpuratus]	TR29348_c0_g1_i1_5		x	x
	LOC100892803 [Strongylocentrotus purpuratus]	TR97000_c0_g1_i1_6		x	x	x	x
	LOC115921503 [Strongylocentrotus purpuratus]	TR57038_c6_g2_i1_6		x	x	x
	LOC100889396 [Strongylocentrotus purpuratus]	TR56442_c2_g1_i1_6		x	x	x	x
	LOC582631 [Strongylocentrotus purpuratus]	TR86146_c0_g1_i1_5		x	x	x
	LOC105437286 [Strongylocentrotus purpuratus]	TR60419_c2_g1_i1_4		x	x	x	x
		TR60419_c2_g1_i2_4		x	x	x	x
	LOC115921681 [Strongylocentrotus purpuratus]	TR56391_c0_g1_i1_6		x	x	x	x
	LOC583017 [Strongylocentrotus purpuratus]	TR63825_c6_g4_i1_4		x	x	x
	putative DDB_G0271606 isoform X7 [Strongylocentrotus purpuratus]	TR63550_c0_g2_i2_4		x	x	x	x
	Uncharacterized protein LOC582480 (SP)	TR46226_c0_g1_i1_4		x	x	x	x
	uncharacterized protein LOC115927989 [Strongylocentrotus purpuratus]	TR46467_c1_g1_i2_6		x	x	x	x
		TR46467_c1_g1_i1_6		x	x	x	x
		TR46467_c0_g1_i3_3		x	x	x	x
		TR46467_c0_g1_i2_3		x	x	x	x
	Uncharacterized protein LOC115928612 SP	TR61808_c3_g2_i2_5		x	x	x	x
		TR63242_c1_g3_i4_2		x	x	x
		TR61808_c3_g2_i4_5		x	x	x	x
		TR61808_c3_g2_i3_6		x	x	x	x
		TR63242_c1_g3_i6_2		x	x	x
		TR40349_c0_g1_i1_1		x	x	x	x
		TR40349_c0_g2_i1_1		x	x	x	x
		TR63242_c1_g3_i1_1		x	x	x	x
		TR63242_c1_g3_i3_1			x
		TR63242_c1_g3_i5_3			x	x
		TR63242_c1_g3_i2_1			x
		TR44357_c1_g1_i1_5			x
	Uncharacterized protein LOC100889388	TR48753_c0_g1_i1_6			x	x	x
	Uncharacterized protein LOC115923299 [SP]	TR61580_c9_g1_i1_6			x	x	x
	Uncharacterized protein LOC587197 [Strongylocentrotus purpuratus]	TR59990_c0_g1_i2_6			x		x
	Uncharacterized Protein LOC115928612 [SP]	TR61808_c3_g1_i1_5			x	x
	LOC582631 [SP]	TR20458_c0_g1_i1_6			x	x	x
		TR20458_c0_g2_i1_6			x		x
	LOC587653[SP]	TR56653_c2_g2_i1_6			x	x	x
		TR56653_c2_g1_i1_6			x		x
	LOC584281 [SP]	TR58483_c1_g1_i1_5			x		x
	LOC581871 [SP]	TR18066_c0_g1_i1_2			x	x	x
		TR18066_c0_g2_i1_2			x	x	x
	LOC586531 [SP]	TR52005_c5_g2_i1_5			x		x
	LOC583017 [Strongylocentrotus purpuratus]	TR63825_c6_g1_i1_5			x		x
	LOC115924547 [Strongylocentrotus purpuratus]	TR2767_c0_g1_i1_4			x		x
	LOC582631 [Strongylocentrotus purpuratus]	TR71601_c0_g1_i1_5			x		x
	LOC100892301 [Strongylocentrotus purpuratus]	TR57905_c0_g1_i3_5			x	x
		TR57905_c0_g1_i1_6			x	x
	LOC121425992 [Lytechinus variegatus]	TR54252_c2_g1_i2_6			x	x	x
		TR98449_c0_g1_i1_1			x	x	x
	LOC583017 [Strongylocentrotus purpuratus]	TR43339_c0_g1_i1_6			x
		TR43339_c0_g1_i2_6			x
	LOC100893569 [Strongylocentrotus purpuratus]	TR63120_c2_g1_i1_5			x	x	x
		TR63120_c6_g1_i1_3			x	x	x
	LOC580499 [Strongylocentrotus purpuratus]	TR60717_c0_g1_i1_4			x	x	x
		TR60717_c0_g1_i2_5			x	x	x
	LOC105439147 [Strongylocentrotus purpuratus]	TR61012_c3_g2_i2_4			x
		TR61012_c4_g1_i1_2			x
		TR20746_c0_g2_i1_1			x
		TR61012_c3_g2_i1_6			x
	LOC105447556 [Strongylocentrotus purpuratus]	TR49966_c3_g1_i3_5			x
		TR49966_c3_g1_i1_6			x
		TR49966_c2_g1_i1_1			x
		TR49966_c1_g1_i2_1			x
	Uncharacterized protein LOC100892318 [SP]	TR51326_c3_g1_i1_6			x	x	x
	Uncharacterized protein LOC100891905 [SP]	TR59651_c4_g1_i1_5			x
	Uncharacterized protein LOC105446227 [SP]	TR52075_c3_g1_i1_6			x	x
		TR52075_c1_g1_i1_3			x
	Uncharacterized protein LOC762976 [SP]	TR801_c0_g1_i1_3			x
	Uncharacterized protein LOC582631 [SP]	TR10699_c0_g1_i1_4			x
	Uncharacterized protein LOC582631 [Strongylocentrotus purpuratus]	TR61312_c0_g1_i1_4		x	x	x	x
		TR61312_c0_g1_i2_6		x	x	x	x
		TR61312_c0_g1_i3_4		x	x	x	x
		TR48956_c1_g2_i1_3				x
	LOC582269 [SP]	TR63152_c3_g1_i3_4				x	x
		TR63152_c3_g1_i2_4				x	x
		TR4967_c0_g1_i1_2				x	x
		TR70898_c0_g1_i1_2				x	x
		TR63152_c0_g1_i1_3				x	x
		TR63152_c1_g1_i1_1				x	x
	uncharacterized protein LOC577523 isoform X2 [Strongylocentrotus purpuratus]	TR60940_c1_g1_i2_5				x
	LOC582631	TR61312_c1_g1_i1_5		x	x	x	x
		TR13004_c0_g1_i1_6		x	x	x
	LOC582631	TR51053_c1_g2_i1_4		x	x	x	x
		TR51053_c1_g1_i1_4		x	x	x	x
		TR51053_c1_g1_i3_4		x	x	x	x
		TR44721_c0_g1_i1_6					x
	LOC582631	TR44131_c0_g1_i1_4		x	x	x	x
	LOC582631	TR51053_c0_g1_i1_5		x	x	x	x
	LOC100892803	TR46688_c0_g1_i1_6		x	x	x	x
	LOC446192	TR58080_c1_g1_i4_5				x
	uncharacterized protein LOC582631	TR21913_c0_g1_i1_4		x	x	x	x
	uncharacterized protein LOC582631	TR40059_c0_g1_i1_5		x	x	x	x
		TR40059_c0_g1_i2_5		x	x	x	x
		TR60253_c7_g1_i1_3		x	x	x	x
Adhesion	A2M	TR61622_c8_g1_i2_4		x	x	x	x
		TR61622_c3_g1_i1_1		x	x	x	x
		TR98982_c0_g1_i1_2		x	x	x	x
		TR61622_c8_g1_i1_6		x	x	x	x
		TR95747_c0_g1_i1_3		x	x	x	x
		TR61622_c3_g2_i1_1		x	x	x	x
	Alpha 2 macroglobulina	TR63864_c3_g1_i1_4				x	x
		TR63864_c4_g1_i1_2				x
		TR63864_c3_g1_i2_5				x	x
	A2MR	TR52163_c4_g1_i1_4		x	x	x	x
		TR52163_c4_g1_i2_6		x		x	x
		TR52163_c4_g1_i3_6
	A2MR	TR58297_c2_g2_i3_5
	Alpha-tectorin	TR59209_c5_g1_i1_6		x	x	x	x
	Oncoprotein-induced transcript 3 protein	TR61200_c2_g2_i3_6		x	x	x
		TR55242_c2_g1_i2_2		x	x	x	x
		TR55242_c2_g1_i1_2		x	x	x	x
		TR55242_c2_g1_i5_2		x	x	x
		TR55242_c2_g1_i4_6			x	x
	cell surface glycoprotein 1 isoform X3 [Strongylocentrotus purpuratus]	TR49040_c0_g1_i1_6		x	x	x	x
		TR49040_c2_g1_i1_1		x	x	x	x
	galactose-specific cell agglutination protein gsf2-like [Strongylocentrotus purpuratus]	TR34545_c1_g2_i2_4		x	x	x
	Galectin-4	TR60045_c9_g1_i1_5		x	x	x	x
		TR60045_c9_g1_i3_6		x	x	x	x
		TR60045_c6_g1_i2_1		x	x	x	x
		TR60045_c6_g1_i3_1		x	x	x	x
		TR17408_c0_g1_i1_1		x	x	x	x
		TR60045_c6_g1_i1_3		x	x	x	x
		TR60045_c6_g2_i1_3		x	x	x	x
	hypothetical protein BOX15_Mlig024551g1, partial [Macrostomum lignano]	TR55393_c3_g1_i1_5		x		x	x
		TR56051_c0_g1_i5_6		x	x	x	x
		TR56051_c0_g1_i2_5		x	x	x	x
	integrin beta	TR63909_c8_g1_i7_4		x	x	x	x
		TR63909_c8_g1_i4_6		x	x	x	x
		TR63909_c9_g1_i1_2		x	x	x	x
	Integrin beta G subunit (SP)	TR56258_c0_g2_i1_6		x	x	x	x
		TR58275_c0_g2_i2_4		x	x	x	x
		TR56258_c0_g2_i2_6		x	x	x	x
		TR58275_c0_g2_i4_4		x	x	x
		TR58275_c0_g2_i1_4		x	x	x	x
		TR97137_c0_g1_i1_3			x		x
	Integrin alpha	TR55334_c1_g1_i2_4		x	x	x	x
	Integrin alpha-V	TR61049_c0_g1_i1_6		x	x	x	x
	integrin alpha	TR58727_c1_g1_i1_5				x	x
		TR58727_c1_g1_i2_6				x	x
	Integrin beta-c	TR58909_c0_g2_i2_6			x
		TR58909_c0_g2_i1_5			x
		TR58909_c0_g2_i5_5			x
	L-rhamnose-binding lectin CSL3-like	TR31194_c0_g1_i1_5		x	x	x	x
		TR89452_c0_g1_i1_3		x	x	x
	Mesenchyme-specific cell surface glycoprotein	TR55893_c4_g1_i1_5		x	x	x	x
		TR55893_c1_g1_i1_1		x	x	x	x
		TR857_c0_g1_i1_3		x	x	x	x
		TR55893_c6_g1_i1_2		x	x	x	x
		TR19090_c0_g1_i1_2			x	x	x
	Mucin-19-like isoform X3 (SP)	TR43257_c2_g1_i2_5		x	x	x	x
		TR43257_c2_g1_i1_5		x	x	x	x
		TR43257_c2_g1_i3_4		x	x	x	x
		TR43257_c0_g1_i1_2		x	x	x	x
	Myeloperoxidase (SP)	TR57217_c2_g1_i1_5		x	x	x	x
		TR57217_c2_g1_i3_4		x	x	x	x
		TR57217_c1_g1_i1_3		x	x	x	x
		TR57217_c2_g1_i4_6			x		x
		TR57217_c2_g1_i2_6			x		x
	Mucin-5AC (Fragments)	TR44760_c2_g1_i2_5		x	x	x	x
	Nectin	Nectin_variant2_GB_KT351732.1_UniProt_A0A182BBB6		x	x	x	x
		Nectin_variant1_GB_AJ578435.2_Uniprot_Q70JA0		x	x	x	x
	Nectin variant 3	Nectin_variant3_Transcriptome_TR60905		x	x	x	x
		TR60905_c1_g1_i2_5		x	x	x	x
		TR60905_c0_g1_i1_1		x	x	x	x
		TR91626_c0_g1_i1_1		x	x	x	x
		TR83745_c0_g1_i1_2		x	x	x	x
		TR43834_c0_g2_i1_5		x	x	x	x
	fasciclin	TR58553_c3_g2_i2_4			x
		TR84271_c0_g1_i1_2			x
		TR99742_c0_g1_i1_1			x
	Fibrillin	TR62705_c3_g1_i2_6			x	x	x
		TR62705_c3_g1_i1_6			x	x	x
	MSP 130	TR51354_c0_g1_i2_5				x	x
		TR51354_c0_g1_i1_4				x
	LOC100892803 [XP_030852014.1]	TR63383_c2_g1_i1_5		x	x	x	x
		TR63383_c1_g1_i1_1		x	x	x	x
		TR63383_c0_g1_i1_1		x	x	x	x
		TR35388_c0_g1_i1_2					x
		TR35388_c1_g1_i1_2			x		x
	mesenchyme-specific cell surface glycoprotein	TR49525_c1_g1_i1_5		x	x	x
		TR85152_c0_g1_i1_1		x	x	x
		TR7880_c0_g1_i1_3		x	x	x
	Galectin-3-binding protein	TR60672_c0_g1_i2_5		x	x	x	x
		TR60672_c0_g1_i1_5		x	x	x	x
	Low-density lipoprotein receptor related	TR50226_c2_g1_i1_6			x	x
	Rhamnose-binding lectin-like (SP)	TR31847_c0_g1_i1_6		x	x	x	x
	IgGFc-binding protein	TR57783_c0_g1_i1_4			x
	sushi, von Willebrand factor type A, EGF and pentraxin domain-containing protein	TR23671_c1_g1_i1_6			x
	sushi, von Willebrand factor type A, EGF and pentraxin domain-containing protein 1 isoform X1 [Strongylocentrotus purpuratus]	TR55201_c4_g1_i1_6			x
	Sushi, von Willebrand factor type A, EGF and pentraxin domain-containing protein 1	TR10745_c0_g1_i1_6				x	x
	sushi, von Willebrand factor type A, EGF and pentraxin domain-containing protein 1	TR64601_c7_g1_i9_4					x
		TR64601_c7_g1_i7_4					x
		TR64601_c7_g1_i10_6					x
		TR12812_c0_g1_i1_6
		TR64601_c7_g1_i5_4					x
		TR43636_c0_g1_i1_1					x
	sushi, von Willebrand factor type A, EGF and pentraxin domain-containing protein 1	TR63729_c4_g3_i2_5			x		x
		TR50515_c0_g1_i2_5			x
		TR63729_c2_g1_i1_1			x		x
		TR50515_c0_g1_i1_5			x		x

## Sheet: Table S4
Table S3. Candidate adhesive proteins proposed by Pjeta et al. (2020). Search results for the sixteen candidate adhesive proteins presence in the recovered glycoproteins (absent proteins are highlighted in red). The correspondent COV and HIT is descriminated for each pulldown assay (N=2). Abbreviations: Bf, Branchiostoma floridae; COV, sequence coverage (%); Ef, Enterococcus faecium; GSL II, Grif…
		GSL II 1		GSL II 2		WGA 1		WGA 2		LEL 1		LEL 2		SBA 1		SBA 2
Transcript	Predicted protein	HIT	COV	HIT	COV	HIT	COV	HIT	COV	HIT	COV	HIT	COV	HIT	COV	HIT	COV
TR60905_c1_g1_i1_5	Nectin variant 2 precursor [Pl]	3	39	1	35	1	41	2	34	1	47.3	4	39.7	1	39	1	35
TR63383_c2_g1_i1_5	alpha-tectorin [Sp]	109	9	187	6	76	10	1100	0.5	86	8	352	4	9	15	39	12
TR43200_c3_g1_i5	BRFLDRAFT_90418 [Bf]	x	x	x	x	x	x	x	x	x	x	x	x	x	x	x	x
TR57217_c2_g1_i1_5	myeloperoxidase [Sp]	134	5	344	5	125	10.5	100	13	414	3	364	4	174	8	112	8
TR63654_c4_g1_i1	neurogenic locus notch homolog [Sp]	x	x	x	x	x	x	x	x	x	x	x	x	x	x	x	x
TR61622_c8_g1_i2_4	alpha-2-macroglobulin-like [Sp]	49	10	35	10	51	10.6	44	9.8	32	11	48	10	30	14	43	11
TR52215_c0_g3_i6	integumentary mucin C.1 [Sp]	x	x	x	x	x	x	x	x	x	x	x	x	x	x	x	x
TR58202_c1_g1_i1	hypothetical protein [Ef]	x	x	x	x	x	x	x	x	x	x	x	x	x	x	x	x
TR50813_c1_g1_i4	uncharacterized protein LOC1008921 [Sp]	x	x	x	x	x	x	x	x	x	x	x	x	x	x	x	x
TR50813_c1_g2_i1	uncharacterized protein LOC105440060 [Sp]	x	x	x	x	x	x	x	x	x	x	x	x	x	x	x	x
TR46467_c1_g1_i2_6	N/A	25	25	x	x	111	24.6	x	x	169	14	108	25	172	19	99	27
TR46688_c0_g1_i1_6	uncharacterized protein LOC100892803 [Sps]	12	12	173	10.1	360	7	392	5.1	242	11	242	11	126	13	350	5
TR35634_c1_g1_i1	uncharacterized protein LOC105437721 [Sp]	x	x	x	x	x	x	x	x	x	x	x	x	x	x	x	x
TR42843_c2_g1_i2	uncharacterized protein LOC105437721 [Sp]	x	x	x	x	x	x	x	x	x	x	x	x	x	x	x	x
TR55893_c4_g1_i1_5	primary mesenchyme specific protein MSP130-related-2 precursor [Sp]	7	7	175	5	35	20.5	41	21	60	16	53	15	50	16	41	20
TR51354_c0_g1_i3	msp130 protein [Ht]	x	x	x	x	x	x	x	x	x	x	x	x	x	x	x	x
																					11
																					43
																					14
																					30
																					10
																					48
																					11
																					32
																					9.8
																					44
																					10.6
																					51
																					10
																					35
																					10
																					49
																					alpha-2-macroglobulin-like [Sp]
																					TR61622_c8_g1_i2_4

## Sheet: Table S5
Table S5. Adhesive candidate proteins glycosylation predictions.
			O-glycosylation		N-glycosylation		Glycosylation (experimental data)	Lectin pulldown results
Transcript	Seq ID	Length (aa)	Ser/Thr residues in each sequence	Ser/Thr residues predicted to be glycosylated	Asn residues in each sequence	Asn residues predicted to be glycosylated	O- and N- glycans	GSL II 1		GSL II 2		WGA 1		WGA 2		LEL 1		LEL 2		SBA 1		SBA 2
								HIT	COV	HIT	COV	HIT	COV	HIT	COV	HIT	COV	HIT	COV	HIT	COV	HIT	COV
---	Nectin variant 1	984	155	13	---	---		1	47.4	2	42.1	1	53.5	2	40.7	1	52.6	4	38.1	1	56	1	43.1
	Nectin variant 2	984	156	12	---	---		2	55.1	1	47.5	1	54.4	2	46	1	47.6	4	43.4	1	56	1	47.7
TR60905_c1_g1_i1	Nectin variant 3	984	147	11	0	0		3	39	1	35	1	51.3	2	43	1	47.3	4	39.7	1	50.6	1	44.6
TR63383_c2_g1_i1	Alpha-tectorin like	> 1883	153	33	2	1		109	9	187	6	76	10	1100	0.5	86	8	352	4	9	15	39	12
TR46688_c0_g1_i1			104	41	2	2		25	25	x	x	111	24.6	x	x	169	14	108	25	172	19	99	27
TR57217_c2_g1_i1	Alpha-macroglobulin like	> 1414	115	5	---	---		49	10	35	10	51	10.6	44	9.8	32	11	48	10	30	14	43	11
TR61622_c8_g1_i2	Myeloperoxidase	829	85	16	4	2		134	5	344	5	125	10.5	100	13	414	3	364	4	174	8	112	8
TR46467_c1_g1_i2	Uncharacterized protein	382	18	---	---	---		12	12	173	10.1	360	7	392	5.1	242	11	242	11	126	13	350	5

## Sheet: Table S6
Table S6. Nectin variant 3 unique peptides. Unique peptides obtained by MS/MS for Paracentrotus lividus Nectin variant 3. Protein sequence coverage for each replicate is described after each lectin (N=2). Peptides were found in replicate 1 (represented as black), replicate 2 (grey) or in both (bold). Absent peptides were marked with a black square.
Nectin variant 3 (TR60905_c1_g1_i1_5)
Peptides	GSL II	WGA	LEL	SBA
	(38,7 | 35)	(40,5 | 33,9)	(37,3 | 31,4)	(39,1 | 35,2)
LGIEDGR	yes	yes	yes	yes
VFVGNGDR	yes	yes	yes
LGMEDGR	yes	yes	yes	yes
IFTANTDR	yes	yes	yes	yes
VTGIITQGR	yes		yes
IFAVATQGR	yes	yes	yes	yes
LNLPLSGALK	yes	yes	yes	yes
SRLDTAAGAGK	yes	yes	yes	yes
FEVLGSIASK	yes	yes	yes	yes
QDANQWVTGFR	yes	yes	yes	yes
NGYSQWVTSFR	yes	yes	yes	yes
QDLNQWVTSYK	yes	yes	yes	yes
FEPLKLGMEDGR	yes	yes	yes	yes
QAFEVTGIITQGR	yes	yes	yes	yes
QLHEVSGVMTQGR	yes	yes	yes	yes
VLPDEWHGHISMR	yes	yes	yes	yes
LLPATWNSHISLR		yes	yes
TNDQDQYIQVDLR	yes	yes	yes	yes
DSLVISMLPLPVTAR	yes	yes	yes	yes
TNDLDQWIQVDLR	yes	yes	yes	yes
WELIGMGPTTLAGSSR	yes	yes	yes	yes
NTIVTNSLPVPQVCR	yes	yes	yes	yes
STQVTNYFAPPFTAR	yes	yes	yes	yes
FELLGDGPINVVSTPGK	yes	yes	yes	yes
TNNVNQWIQVDLLSPYR	yes	yes	yes	yes
IPDSAITASTQYDANHGPQR	yes	yes	yes	yes
IAASSLSASSCYDGNHCVDR	yes	yes	yes	yes
LTDVQITASSCFDGNHCTDR	yes	yes	yes	yes
IADSQLSSSTCYDVNHCVDR	yes	yes	yes	yes
IACSSDGATFDTVQGICTNAAADR	yes	yes	yes	yes
VESSDDGVTFNPILDCSGNQQVFTGNADR	yes	yes	yes	yes
VLSSLDGLTFTPIPNAMMAGSDIFNGNSDR	yes	yes	yes	yes
GCLAETQIFPGNFDADSLVENAISPPVTAR	yes	yes	yes	yes
VESSDDGVTFNPILDCSGNQQVFTGNADRNTK	yes	yes	yes	yes
IHPETWSGHISMR		yes		yes
FEPVTWANHISMR		yes		yes
NGEDFTTISSPSTPLQDK	yes	yes		yes
KLGLEDYR	yes	yes
QDANQWVTGFRVESSDDGVTFNPILDCSGNQQVFGNADR		yes
TGAWSAR	yes
40 peptides

## Sheet: Table S7
Table S7: Alpha-macroglobulin unique peptides. Unique peptides were obtained by MS/MS for Paracentrotus lividus alpha-macroglobulin like protein. Protein sequence coverage for each replicate is described after each lectin (N=2). Peptides were found in replicate 1 (represented as black), replicate 2 (grey) or in both (bold). Absent peptides were marked with a black square.
Alpha macroglobulin (TR61622_c8_g1_i2_4)
Peptides	GSL II	WGA	LEL	SBA
	(10,3 | 9,5)	(10,6 | 9,8)	(7,6 | 9,5)	(13,6 | 11)
IDNNDLQR	yes	yes	yes	yes
TEVVSFLNR			yes	yes
WLVSQQGPR	yes	yes	yes	yes
GYQGQLNFR	yes	yes	yes	yes
EFEELGLVR	yes	yes	yes	yes
IEEGVTHSDGLR	yes	yes	yes	yes
VHTTCDCPGGVK	yes	yes	yes	yes
GSGEFDLVDSSNR	yes	yes	yes	yes
AVALEAVAVGGPPAIR	yes	yes	yes	yes
YTDVTKEFEELGLVR	yes	yes	yes	yes
DLDSLIQGDLTLIEYR	yes	yes	yes	yes
HTFEVTVPEEYVADSGR			yes	yes
TSGAYSAFGNSDPEGSAWLSAYVVR	yes	yes	yes	yes
KASDVLQVR			yes
EAEAAVFHR			yes
TGLLAGGGSAEVK			yes
SVETLMDMIK			yes
TCSIAVALDTK			yes
NSGIICTIGPVSR			yes
VVTANTFLDHCSK			yes
FFEDNTPVIVVTGWR			yes
VLDVGGTIFVDDGLIALK			yes
KGVNLPNAEVDLPALSDK			yes
EVDMPTSAGLTVAIAAVEASYK			yes
VAEIGADYLDCQIVNGGMLGSR			yes
AETSDVANAVLDGADCVMLSGETAK			yes
SFAQAGQFIK	yes	yes		yes
WLLNNLGQQDNGCFMNR		yes		yes
VIIFLSGDILGNSLTNIDSLLR		yes		yes
29 peptides
	12	14	26	17

## Sheet: Table S8
Table S8. Alpha-tectorin like unique peptides. Two transcripts (TR46688_c0_g1_i1_6 and TR63383_c2_g1_i1_5) were identified as different parts of a larger sequence. Unique peptides were obtained by MS/MS for Paracentrotus lividus alpha-tectorin like protein. Protein sequence coverage for each replicate is described after each lectin (N=2). Peptides were found in replicate 1 (represented as black),…
Alpha tectorin like
TR46688_c0_g1_i1_6
Peptides	GSL II	WGA	LEL	SBA
	(12,1 | 10,1)	(7,4 | 5,1)	(6,4 | 11,2)	(12,5 | 4,5)
SYCDSLEAYVSR	yes	yes	yes	yes
ELFLDECSYDVCR	yes		yes	yes
IDGLPVQLDFTDSSTPPLFR	yes	yes	yes	yes
NIPLPDWR	yes		yes	??
CQGIESCAFQVSTGLFSADPCPLTPK	yes		yes	yes
TGACIEMQCQNGGYCIR				yes
HEAHIGETFDVLAR		yes
LGEDVRIDGLPVQLDFTDSSTPPLFR	yes	yes
CVCQPDFILK		yes
TR46688_c0_g1_i1_6
Peptides	GSL II	WGA	LEL	SBA
	(8,7 | 6,4)	(9,5 | 0,5)	(7,6 | 4,3)	(15 | 4,5)
ECGCLVEGK	yes	yes	yes	yes
LFGDPCFTK	yes	yes	yes	yes
VYQACSEGVTK			yes	yes
CYEVCECPPGK	yes	yes	yes	yes
DSTGCSYMCPLGK	yes	yes	yes	yes
HCGLTDLQVSCSK	yes	yes	yes	yes
YLEVEYECLETK	yes	yes	yes	yes
CAHYEAYADACQAK			yes	yes
CELWANGEYFPDPCPATFK	yes	yes	yes	yes
DICAADNIGDQSCHEPTSLGVVMSK	yes	yes	yes	yes
EFYLDGER		yes		yes
VAMTCQGLTR		yes		yes
EESCFSATAEVR				yes
IICQDNPVMLNCR	yes	yes		yes
DCTICNGCQDIEACTR	yes			yes
VQHHCTQQPLASEVPQTPVR				yes
GGSVVASAPAFGFSWASNSPDCPTR				yes
DNIHEVDDYDVEAPFSVSTGDAMLSVR		yes		yes
SYCDSLEAYVSR				yes
IDGLPVQLDFTDSSTPPLFR				yes
CPFCTQDPSCTDQIAQLDASSVCSEMNTPFK	yes
30 peptides

## Sheet: Table S9
Table S9. Myeloperoxidase unique peptides. Unique peptides were obtained by MS/MS for Paracentrotus lividus myeloperoxidase. Protein sequence coverage for each replicate is described after each lectin (N=2). Peptides were found in replicate 1 (represented as black), replicate 2 (grey) or in both (bold). Absent peptides were marked with a black square.
Myeloperoxidase (TR57217_c2_g1_i1_5)
Peptides	GSL II	WGA	LEL	SBA
	(5 | 5)	(10,5 | 12,7)	(3 | 3,8)	(7,6 | 8,2)
VLCETLDNPVTFQK	yes	yes	yes	yes
YLIDSETGEATPLDPLPITK	yes	yes	yes	yes
LFVDPDDDEDATGLDLMSLNVLR	yes	yes	yes	yes
NPAWVLDSDR		yes		yes
FHTSPDAEPSDVDLALSAGR				yes
FFYLNQDGPQAFTEDQR		yes		yes
NAIHDVTMAR		yes
FVDDIDPFIGFIAEEPANDDGTLGPTLSCIIGSQFK		yes
GSLLPHPEEISGNCFGEDETTGIICGDAGDFR		yes
9 peptides

## Sheet: Table S10
Table S10. Uncharacterized protein unique peptides. Unique peptides were obtained by MS/MS for Paracentrotus lividus uncharacterized protein. Protein sequence coverage for each replicate is described after each lectin (N=2). Peptides were found in replicate 1 (represented as black), replicate 2 (grey) or in both (bold). Absent peptides were marked with a black square.
Uncharacterized protein (TR46467_c1_g1_i2)
Peptides	GSL II	WGA	LEL	SBA
	(24,6 | ---)	(24,6 | ---)	(13,9 | 24,6)	(18,8 | 27)
AGEGWEFFK	yes	yes	yes	yes
HAFPDDIPSLR	yes	yes	yes	yes
MVVLPCDEELGYLCK	yes	yes	yes	yes
DANAACKPWDEEICSASR	yes	yes	yes	yes
NGYLFWSGVK	yes	yes	yes	yes
ECVAFDMSGDR	yes	yes	yes	yes
GWQSYLASYLTDGELEGAFR	yes	yes	yes	yes
KAYDAACIK				yes
8 peptides

[truncated: 2 more sheets: Table S11, Table S12]
